1  
2  
3  
4  
5  
6  
7  
8  
9  
10  
11  
12  
13  
14  
15  
16  
17  
18  
19  
20  
21  
22  
23  
24  
25  
26  
27  
28  
29  
30  
31  
32  
33

## **Optogenetics and electron tomography for structure-function analysis of cochlear ribbon synapses**

Rituparna Chakrabarti<sup>1,2,3\*</sup>, Lina Maria Jaime Tobon<sup>3,4,5\*</sup>, Loujin Slitin<sup>1,2,3\*</sup>, Magdalena Redondo-Canales<sup>1,2,3</sup>, Gerhard Hoch<sup>4,5</sup>, Marina Slashcheva<sup>6</sup>, Elisabeth Fritsch<sup>6</sup>, Kai Bodensiek<sup>4</sup>, Özge Demet Özçete<sup>3,4,5</sup>, Mehmet Gültas<sup>7</sup>, Susann Michanski<sup>1,2,3</sup>, Felipe Opazo<sup>2,9,10</sup>, Jakob Neef<sup>3,4,5</sup>, Tina Pangrsic<sup>3,4,5,11§</sup>, Tobias Moser<sup>3,4,5,11#</sup>, Carolin Wichmann<sup>1,2,3,11#</sup>

1. Molecular Architecture of Synapses Group, Institute for Auditory Neuroscience and InnerEarLab, University Medical Center Göttingen, Göttingen, Germany
2. Center for Biostructural Imaging of Neurodegeneration, University Medical Center Göttingen, Göttingen, Germany
3. Collaborative Research Center 889 “Cellular Mechanisms of Sensory Processing”, 37099 Göttingen, Germany
4. Institute for Auditory Neuroscience and InnerEarLab, University Medical Center Göttingen, 37075 Göttingen, Germany
5. Auditory Neuroscience & Synaptic Nanophysiology Group, Max Planck Institute for Multidisciplinary Sciences, 37077 Göttingen, Germany
6. Göttingen Graduate School for Neuroscience and Molecular Biosciences, University of Göttingen, Göttingen, Germany
7. Faculty of Agriculture, South Westphalia University of Applied Sciences, 59494 Soest, Germany
8. Institute of Neuro- and Sensory Physiology, University Medical Center Göttingen, Humboldtallee 23, 37073 Göttingen, Germany.
9. NanoTag Biotechnologies GmbH, Rudolf-Wissell-Straße 28a, 37079 Göttingen, Germany.
10. Synaptic Physiology of Mammalian Vestibular Hair Cells Group, Institute for Auditory Neuroscience and InnerEarLab, University Medical Center Göttingen, Germany.
11. Multiscale Bioimaging of Excitable Cells, Cluster of Excellence, 37075 Göttingen, Germany

34 §present address: Experimental Otology Group, Department of Otolaryngology and  
35 InnerEarLab, University Medical Center Göttingen, Göttingen, Germany  
36 \*equal contribution # shared correspondence

## 37 Abstract

38 Ribbon synapses of cochlear inner hair cells (IHCs) are specialized to indefatigably  
39 transmit sound information at high rates. To understand the underlying mechanisms,  
40 structure-function analysis of the active zone (AZ) of these synapses is essential.  
41 Previous electron microscopy studies of synaptic vesicle (SV) dynamics at the IHC AZ  
42 used potassium stimulation, which limited the temporal resolution to minutes. Here, we  
43 established optogenetic IHC stimulation followed by quick freezing within milliseconds  
44 and electron tomography to study the ultrastructure of functional synapse states with good  
45 temporal resolution. We characterized optogenetic IHC stimulation by patch-clamp  
46 recordings from IHCs and postsynaptic boutons revealing robust IHC depolarization and  
47 transmitter release. Ultrastructurally, the number of docked SVs increased and distances  
48 to the presynaptic density decreased upon short (17-25 ms) and long (48-76 ms) light  
49 stimulation paradigms. We did not observe enlarged SVs or other morphological  
50 correlates of homotypic fusion events. Our results suggest a rapid replenishment of  
51 docked SVs at IHC ribbon synapses and argue against synchronized multiquantal release  
52 under our experimental conditions.

## 53 Introduction

54 Ribbon synapses of cochlear inner hair cells (IHCs) are specialized to maintain high  
55 release rates over prolonged periods of time. Their landmark structure, the synaptic  
56 ribbon, tethers several dozens of synaptic vesicles (SVs) and keeps them close to the  
57 active zone (AZ) membrane (Moser et al., 2019; Rutherford et al., 2021; Safieddine et al.,  
58 2012; Wichmann and Moser, 2015). Deciphering the mechanisms of SV release and  
59 replenishment in IHCs is required to understand their efficient and indefatigable glutamate  
60 release. Ultrastructural analysis of SV pools in defined functional states, such as during  
61 phasic or sustained transmitter release, is an important approach to investigate  
62 presynaptic mechanisms in general.

63 Numerous studies based on electron tomography (ET) describe the presence of  
64 morphologically docked SVs at central synapses (e.g. Hintze et al., 2021; Imig et al.,  
65 2014; Imig et al., 2020; Kusick et al., 2020; Maus et al., 2020; Siksou et al., 2007). At  
66 such conventional synapses, docked SVs are thought to constitute the readily-releasable  
67 pool (RRP) (Schikorski and Stevens, 1997), while SVs tethered to the AZ might represent  
68 morphological correlates for SV recruitment to the release sites (Cole et al., 2016;  
69 Fernández-Busnadiego et al., 2010; Fernández-Busnadiego et al., 2013; Maus et al.,  
70 2020; Siksou et al., 2007). Recruitment appears to involve a first step mediated by long  
71 tethers of up to 45 nm, followed by formation of shorter tethers which might correspond  
72 to the soluble N-ethylmaleimide-sensitive-factor attachment receptor (SNARE) complex  
73 (Cole et al., 2016; Fernández-Busnadiego et al., 2010; Imig et al., 2014). Therefore,  
74 morphological features like tethering or docking might reflect different functional states of  
75 SVs *en route* to fusion.

76 Correlating function and structure ideally employs rapid immobilization of the synapses in  
77 defined functional states. Recently, SV dynamics were investigated by combining  
78 optogenetics with immobilization within milliseconds by high-pressure freezing (Opto-  
79 HPF). Optogenetics grants short, precise stimulation of neurons expressing the light-  
80 sensitive ion channel channelrhodopsin (ChR) (Nagel et al., 2002; Nagel et al., 2003).  
81 Such precise stimulation allowed to ultrastructurally resolve transient events of  
82 exo/endocytosis at several conventional synapses such as *C. elegans* neuromuscular  
83 junctions (Kittelman et al., 2013; Watanabe et al., 2013a) and murine hippocampal  
84 synapses (Borges-Merjane et al., 2020; Imig et al., 2020; Watanabe et al., 2013b).

85 Until now, structure-function analysis of hair cell ribbon synapses relied on seconds to  
86 minutes range depolarization by high K<sup>+</sup> (Chakrabarti et al., 2018; Jung et al., 2015b;  
87 Lenzi et al., 2002; Pangrsic et al., 2010; Strenzke et al., 2016). SVs situated close to the  
88 AZ membrane — referred to as the membrane-proximal (MP)-SV pool — are thought to  
89 represent the RRP, while SVs around the ribbon — ribbon-associated (RA)-SVs — seem  
90 to be recruited for release in a later phase (Lenzi et al., 2002). MP-SVs are often  
91 connected to the AZ membrane by tethers (Chakrabarti et al., 2018; Frank et al., 2010;  
92 Vogl et al., 2015) and seem to be organized in sub-pools based on the number and length  
93 of tethers. These sub-pools might represent different recruitment states of the SVs prior

94 to docking. However, docked SVs are rare in IHCs at rest but become more frequent upon  
95 prolonged K<sup>+</sup> depolarization (Chakrabarti et al., 2018). Yet, K<sup>+</sup> depolarization does not  
96 enable a time-resolved analysis of exocytosis at IHC ribbon synapses.  
97 Time-resolved analysis is also relevant when addressing the long-standing quest on  
98 whether SVs fuse in a coordinated manner or independently from each other in IHCs.  
99 From postsynaptic recordings of the spiral ganglion neurons, the high variability in the  
100 amplitude and shape of spontaneous excitatory postsynaptic currents (sEPSCs) was  
101 initially interpreted as the release of multiple SVs in a more or less synchronized manner  
102 (Glowatzki and Fuchs, 2002). The alternative, classical model of unquantal release, was  
103 then proposed based on experiments and modeling (Chapochnikov et al., 2014), and  
104 further corroborated by direct measurements of single fusion events (Grabner and Moser,  
105 2018). In the unquantal release framework, amplitude and shape heterogeneity were  
106 attributed to glutamate release via a fusion pore with different progress towards full  
107 collapse fusion (Chapochnikov et al., 2014). Such different scenarios might be mirrored  
108 in the number of docked SVs, SVs sizes and the distribution of SV pools. For instance,  
109 coordinated multivesicular release by compound and/or cumulative fusion is expected to  
110 result in larger vesicles at the AZ.  
111 Here, we implemented Opto-HPF of IHC ribbon synapses to capture the structural  
112 correlates of exocytosis. We modified a conventional high-pressure freezing machine  
113 (HPM) to control optical stimulation in correlation to freezing on a millisecond time scale.  
114 Our study revealed that upon depolarization (i) the number of docked SVs increases, (ii)  
115 MP-SVs reside closer to the AZ membrane, (iii) correlates of compound and/or cumulative  
116 fusion are lacking and (iii) the total number of RA-SVs remains unchanged. Our results  
117 constitute the first report of morphological correlates to exocytosis occurring within  
118 milliseconds of stimulation at this highly specialized synapse.

## 119 **Materials and Methods**

### 120 **Animals**

121 The mice were bred at the animal facility in the University Medical Center Göttingen  
122 (UMG). Animal handling and all experimental procedures were in accordance with the  
123 national animal care guidelines issued by the animal welfare committees of the University

124 of Göttingen and the Animal Welfare Office of the State of Lower Saxony (AZ  
125 509.42502/01-27.03).

126 For expression of ChR2-H134R-EYFP (Nagel et al., 2003) in IHCs, we crossbred the Ai32  
127 mouse line (Madisen et al., 2012; RRID:IMSR\_JAX:024109) with two different Vglut3-Cre  
128 mouse lines. The ChR2-H134R-EYFP construct is preceded by a STOP codon flanked  
129 by loxP sequences such that expression only commences upon Cre recombination  
130 ( $cre^+/cre^+$  or  $cre^+/cre^-$ ; abbreviated  $cre^+$ ). The first ChR2 Vglut3-driven line, termed  
131 Ai32VC, used a previously published transgenic Vglut3-Cre line (Jung et al., 2015b). In  
132 the Ai32VC line, animals expressing ChR2 were either  $fl/fl\ cre^+$  or  $fl/+ \ cre^+$ , which we will  
133 abbreviate  $Ai32VC\ cre^+$ . For the second ChR2 Vglut3-driven line, termed Ai32KI, we used  
134 Vglut3-Ires-Cre-KI mice (Lou et al., 2013; Vogl et al., 2016). ChR2 expressing animals  
135 were either  $fl/fl\ cre^+/cre^-$  or  $fl/+ \ cre^+/cre^-$ , which we will abbreviate  $Ai32KI\ cre^+$ . Littermate  
136 controls from both lines ( $fl/fl\ +/+$ ) are nicknamed WT. C57Bl6/J mice, are abbreviated  
137 “B6J”.

138 For immunohistochemistry analysis, three age groups of Ai32KI mice were used. The first  
139 group (G1) includes 4-5 months-old mice  $Ai32KI\ cre^+$ ,  $N_{animals} = 3$ ,  $n = 170$  cells; and WT,  
140  $N_{animals} = 2$ ,  $n = 99$  cells. The second group (G2) corresponds to 6-7 months-old mice  
141  $Ai32KI\ cre^+$ ,  $N_{animals} = 2$ ,  $n = 116$  cells; and WT,  $N_{animals} = 2$ ,  $n = 87$  cells. The third group  
142 (G3) includes 9-12 months-old mice  $Ai32KI\ cre^+$ ,  $N_{animals} = 2$ ,  $n = 129$  cells; and WT,  
143  $N_{animals} = 2$ ,  $n = 49$  cells. For patch-clamp recordings, Ai32VC or Ai32KI mice were used  
144 at postnatal days (P) 14-20 (i.e. after the onset of hearing): 7 animals were  $Ai32VC\ cre^+$   
145 ( $fl/fl$ ), 5 animals were  $Ai32VC\ cre^+$  ( $fl/+$ ) and 3 mice were  $Ai32KI\ cre^+$  ( $fl/fl$ ). For pre-  
146 embedding immunogold, we used  $Ai32KI\ cre^+$ . For Opto-HPF,  $Ai32VC\ cre^+$ ,  $Ai32KI\ cre^+$   
147 and B6J mice were used as controls at P14-20 at different stimulation durations (see  
148 Table 1 below).

149

150

151

152

153

154

155

| Experiment                 | genotype                             | N <sub>animals</sub> | n (cells/ribbon) | age                 |
|----------------------------|--------------------------------------|----------------------|------------------|---------------------|
| Immunohistochemistry       | <i>Ai32KI cre<sup>+</sup></i>        | 3                    | 170 cells        | Group 1: 4-5 month  |
|                            | <i>Ai32KI cre<sup>+</sup></i>        | 2                    | 116 cells        | Group 2: 6-7 month  |
|                            | <i>Ai32KI cre<sup>+</sup></i>        | 2                    | 129 cells        | Group 3: 9-12 month |
| Immunohistochemistry       | WT                                   | 2                    | 99 cells         | Group 1: 4-5 month  |
|                            | WT                                   | 2                    | 87 cells         | Group 2: 6-7 month  |
|                            | WT                                   | 2                    | 49 cells         | Group 3: 9-12 month |
| Pre-embedding immunogold   | <i>Ai32KI cre<sup>+</sup></i>        | 1                    |                  | P17                 |
| Patch-clamp                | <i>Ai32VC cre<sup>+</sup>(fl/fl)</i> | 7                    |                  | P14-17              |
|                            | <i>Ai32VC cre<sup>+</sup>(fl/+)</i>  | 5                    |                  | P14-17              |
|                            | <i>Ai32KI cre<sup>+</sup></i>        | 3                    | 21 cells         | P16-20              |
| Electron tomography MP SVs |                                      |                      |                  | P14-20              |
| ShortStim                  | <i>Ai32VC cre<sup>+</sup></i>        | 1                    | 11 ribbons       |                     |
| LongStim                   | <i>Ai32VC cre<sup>+</sup></i>        | 2                    | 15 ribbons       |                     |
| LongStim                   | B6J                                  | 2                    | 15 ribbons       |                     |
| LongStim                   | <i>Ai32KI cre<sup>+</sup></i>        | 2                    | 11 ribbons       |                     |
| NoLight                    | <i>Ai32VC cre<sup>+</sup></i>        | 2                    | 9 ribbons        |                     |
| NoLight                    | <i>Ai32KI cre<sup>+</sup></i>        | 2                    | 8 ribbons        |                     |
| Electron tomography RA SVs |                                      |                      |                  | P14-20              |
| ShortStim                  | <i>Ai32VC cre<sup>+</sup></i>        | 1                    | 11 ribbons       |                     |
| LongStim                   | <i>Ai32VC cre<sup>+</sup></i>        | 1                    | 10 ribbons       |                     |
| LongStim                   | B6J                                  | 1                    | 9 ribbons        |                     |
| LongStim                   | <i>Ai32KI cre<sup>+</sup></i>        | 2                    | 11 ribbons       |                     |
| NoLight                    | <i>Ai32VC cre<sup>+</sup></i>        | 2                    | 9 ribbons        |                     |
| NoLight                    | <i>Ai32KI cre<sup>+</sup></i>        | 2                    | 8 ribbons        |                     |

156 **Table 1 Genotypes, animal numbers as well as the ages of the animals used in the**  
 157 **experiments.**

158  
 159 Some *Ai32VC* animals showed germline recombination of the EGFP cassette from the  
 160 CGCT construct (coming from the *Vglut3-Cre* line) and/or germline recombination of the  
 161 cassette *Chr2-H134R-EYFP* due to unspecific Cre-recombinase activity. This resulted in  
 162 the ectopic expression (e.g. in non-IHCs in the cochlea) of EGFP and/or *Chr2-H134R-*  
 163 *EYFP* in the absence of Cre-recombinase that could be observed using  
 164 immunohistochemistry. Additional primers were designed to detect mice with general  
 165 recombination during genotyping: *Ai32* recombinant (forward primer 5' – GTGCTGTC  
 166 TCATCATTTTGGC – 3', and reverse primer 5' – TCCATAATCCATGGTGGCAAG – 3')  
 167 and CGCT recombinant (forward primer 5' – CTGCTAACCATGTTTCATGCC – 3', and  
 168 reverse primer 5' – TTCAGGGTCAGCTTGCCGTA – 3'). The genotype of the animals  
 169 was determined before the onset of hearing and further corroborated post-mortem.

## 170 Patch-clamp recordings

171 Perforated patch-clamp recordings from IHCs expressing ChR2-H134R-EYFP were  
172 performed as described previously (Moser and Beutner, 2000). Briefly, the apical coils of  
173 the organ of Corti were dissected from euthanized mice at P14-20 in HEPES Hank's  
174 solution containing 5.36 mM KCl, 141.7 mM NaCl, 1 mM MgCl<sub>2</sub>·6H<sub>2</sub>O, 0.5 mM MgSO<sub>4</sub>-  
175 7H<sub>2</sub>O, 10 mM HEPES, 0.5 mg/ml L-glutamine, and 1 mg/ml D-glucose, pH 7.2, osmolarity  
176 ~300 mOsm/l. By removing some supporting cells, the basolateral face of the IHCs was  
177 exposed and patch-clamp was established using Sylgard™-coated 1.5 mm borosilicate  
178 pipettes. The intracellular pipette solution contained: 135 mM KCl, 10 mM HEPES, 1  
179 mM MgCl<sub>2</sub>, and 300 µg/ml amphotericin B (osmolarity ~290 mOsm/l). The organ of Corti  
180 was bathed in an extracellular solution containing 126 mM NaCl, 20 mM TEA-Cl, 2.8 mM  
181 KCl, 2 mM CaCl<sub>2</sub>, 1 mM MgCl<sub>2</sub>, 1 mM CsCl, 10 mM HEPES, and 11.1 mM D-glucose, pH  
182 7.2, osmolarity ~300 mOsm/l. All patch-clamp recordings were performed at room  
183 temperature (20-25°C). An EPC-9 amplifier (HEKA electronics) controlled by Pulse or  
184 Patchmaster software (HEKA electronics) was used for the measurements. Currents  
185 were leak corrected using a p/10 protocol. IHCs with leak currents exceeding -50 pA at -  
186 84 mV holding potential or with a series resistance higher than 30 MΩ were excluded  
187 from the analysis. A red filter was positioned between the light source and the recording  
188 chamber to avoid partial depolarization of the IHCs by the transillumination light.

189 In order to assess optogenetically evoked IHC exocytosis, postsynaptic recordings from  
190 afferent boutons were performed as described previously (Glowatzki and Fuchs, 2002;  
191 Huang and Moser, 2018). Whole-cell patch clamp recordings from the postsynaptic  
192 bouton was established using heat-polished, Sylgard™-coated 1 mm thin-glass  
193 borosilicate pipettes. The intracellular solution contained 137 mM KCl, 5 mM EGTA, 5  
194 mM HEPES, 1 mM Na<sub>2</sub>-GTP, 2.5 mM Na<sub>2</sub>-ATP, 3.5 mM MgCl<sub>2</sub>·6H<sub>2</sub>O and 0.1 mM CaCl<sub>2</sub>,  
195 pH 7.2 and osmolarity of ~290 mOsm/l. Boutons with leak currents exceeding -100 pA at  
196 -94 mV holding potential were excluded from the analysis. The series resistance of the  
197 bouton recordings was calculated offline as reported in (Huang and Moser, 2018).  
198 Recordings with a bouton series resistance > 80 MΩ were discarded.

## 199 Photostimulation for cell-physiology

200 Photostimulation of IHCs was achieved using a blue 473 nm laser (MBL 473, CNI  
201 Optoelectronics). Irradiance and duration of the light pulses were controlled using the  
202 EPC-9 amplifier via a custom controller unit, allowing the transformation of a particular  
203 voltage to a particular laser power (i.e. photostimulation during 5, 10 or 50 ms from 2 to  
204 5 V with different increasing steps). A FITC filter set was used to direct the stimulating  
205 blue light to the sample. Radiant flux (mW) was measured before each experiment with  
206 a laser power meter (LaserCheck; Coherent Inc. or Solo2 Gentec-eo) placed under the  
207 40x objective lens. The diameter of the illumination spot was estimated using a green  
208 fluorescent slide and a stage micrometer, and it was used to calculate the irradiance in  
209 mW/mm<sup>2</sup>. Photocurrents were measured in voltage-clamp mode and the  
210 photodepolarization in current-clamp mode. Only the first series of evoked photocurrents  
211 and photodepolarizations were analyzed in order to rule out potential changes in the  
212 photoresponses due to inactivation of ChR2-H134R-EYFP (Lin et al., 2009).

## 213 Immunohistochemistry

214 Freshly dissected apical turns of the organ of Corti (as described above) were fixed on  
215 ice for 60 min with 4% formaldehyde in Phosphate-Buffered Saline (PBS: 137 mM NaCl,  
216 2.7 mM KCl, 8 mM N<sub>2</sub>HPO<sub>4</sub>, 0.2 mM KH<sub>2</sub>PO<sub>4</sub>), followed by 3x10 min wash with PBS. A  
217 blocking step was performed for 1 h at room temperature with goat serum dilution buffer  
218 (GSDB: 16% goat serum, 450 mM NaCl, 0.3% Triton X-100, and 20 mM phosphate buffer,  
219 pH 7.4). Afterwards, the samples were incubated overnight in a wet chamber at 4°C with  
220 the following GSDB-diluted primary antibodies: chicken anti-GFP (1:500, Abcam,  
221 ab13970; RRID:AB\_300798), rabbit anti-myo6 (1:200, Proteus Biosciences, 25-6791;  
222 RRID:AB\_10013626), mouse anti-CtBP2 (1:200, BD Biosciences, 612044;  
223 RRID:AB\_399431), mouse anti-neurofilament 200 (1:400, Sigma, N5389;  
224 RRID:AB\_260781) and rabbit anti-Vglut3 (1:300, SySy, 135 203; RRID:AB\_887886).  
225 After 3x10 min wash with wash buffer (450 mM NaCl, 0.3% Triton X-100, and 20 mM  
226 phosphate buffer, pH 7.4), GSDB-diluted secondary antibodies were applied for 1 h at  
227 room temperature: goat anti-chicken Alexa Fluor 488 (1:200, Invitrogen, A11039;  
228 RRID:AB\_2534096), AbberiorStar 580 goat conjugated anti-rabbit (1:200, Abberior, 2-  
229 0012-005-8; RRID:AB\_2810981), AbberiorStar 635p goat conjugated anti-mouse (1:200,



230 Abberior, 2-0002-007-5; RRID:AB\_2893232), goat anti-mouse Alexa Fluor 647 (1:200,  
231 Invitrogen, A-21236; RRID:AB\_2535805) and goat anti-rabbit Alexa Fluor 568 (1:200,  
232 ThermoFisher, RRID:AB\_143157). A final washing step was done for 3x10 min with wash  
233 buffer and, exclusively in Ai32VC samples, for 1x10 min in 5 mM phosphate buffer. The  
234 samples were mounted onto glass slides with a drop of mounting medium (Mowiol® 4-  
235 88, Roth) and covered with glass coverslips.

236 Confocal images were acquired using an Abberior Instruments Expert Line STED  
237 microscope with a 1.4 NA 100x oil immersion objective and with excitation lasers at 488,  
238 561, 594 and 633 nm. Images were processed using the FIJI software (Schindelin et al.,  
239 2012) and assembled with Adobe Illustrator Software.

#### 240 Immunogold pre-embedding

241 In order to verify the membrane localization of ChR2 within the IHC, we performed pre-  
242 embedding immunogold labeling using nanogold (1.4 nm gold)-coupled nanobodies  
243 (information see below) for the line *Ai32KI cre<sup>+</sup>* ( $N = 1$ ) on a freshly dissected organ of  
244 Corti. The labeling was essentially done as described in (Strenzke et al., 2016) with a few  
245 modifications. Samples were fixed in 2% paraformaldehyde with 0.06% glutaraldehyde in  
246 1x piperazine-N,N'-bis(2-ethanesulfonic acid)-EGTA-MgSO<sub>4</sub> (PEM) solution (0.1 M  
247 PIPES; 2 mM EGTA; 1 mM MgSO<sub>4</sub> x 7H<sub>2</sub>O) for 90 min on ice and subsequently washed  
248 twice for 15 min each in 1x PEM at RT. Next, the samples were blocked for 1 h in 2%  
249 BSA / 3% normal horse serum (NHS) in 0.2% PBS with Triton X-100 detergent (PBST)  
250 at RT. The incubation with the anti-GFP 1.4 nanogold-coupled nanobody was performed  
251 overnight at 4°C: anti-GFP in PBS with 0.1% PBST 1:100. On the next day, samples were  
252 washed three times for 1 h in PBS at RT and post-fixed for 30 min in 2% glutaraldehyde  
253 in PBS at RT. After four washes for 10 min in distilled H<sub>2</sub>O at RT, silver enhancement was  
254 performed for 4 min in the dark using the Nanoprobes Silver enhancement Kit  
255 (Nanoprobes, USA). After incubation, the solution was quickly removed and washed twice  
256 with water for a few seconds. After removal of the enhancement solution, 4x10 min  
257 washing steps in distilled H<sub>2</sub>O were performed. Subsequently, samples were fixed for 30  
258 min in 2% OsO<sub>4</sub> in 0.1 M cacodylate buffer (pH 7.2) and washed 1 h in distilled H<sub>2</sub>O.  
259 Samples were further washed over night in distilled H<sub>2</sub>O at 4°C. On the next day,  
260 dehydration was performed: 5 min 30%; 5 min 50%; 10 min 70%; 2x10 min 95%; 3x12

261 min 100%; 1x30 min, 1x1.5 h 50% pure EtOH and 50% epoxy resin (Agar100, Plano,  
262 Germany) at RT on a shaker. Samples were then incubated overnight in pure epoxy resin  
263 at RT on a shaker. On day four, another incubation step took place in pure epoxy resin  
264 for 6 h on a shaker and finally samples were transferred to embedding moulds with fresh  
265 epoxy resin for polymerization for 2 days at 70°C.

#### 266 **Stoichiometric conjugation of an anti-GFP nanobody with 1.4 nm gold particle**

267 Anti-GFP nanobody carrying a single ectopic cysteine at its C-terminus (NanoTag  
268 Biotechnologies GmbH, Cat# N0301-1mg) was used for conjugation with 1.4 nm mono-  
269 maleimide gold particles (Nanoprobes Inc., Cat# #2020-30NMOL). The ~30 nmol of anti-  
270 GFP nanobody was first reduced using 10 mM tris (2-carboxyethyl)phosphine (TCEP) for  
271 30 minutes on ice. Next, the excess of TCEP was removed using a NAP-5 gravity column  
272 and the nanobody immediately mixed with lyophilized 120 nmol of mono-maleimide 1.4  
273 nm gold particles. The mixture was incubated for 4 h on ice with sporadic movement.  
274 Finally, the excess of unconjugated gold was removed using an Äkta pure 25 FPLC,  
275 equipped with a Superdex 75 Increase 10/300 column.

#### 276 **Sample mounting for Opto-HPF**

277 After dissection, the samples (*Ai32VC cre<sup>+</sup>* or *Ai32KI cre<sup>+</sup>* (both: (*fl/+ cre<sup>+</sup>* or *fl/fl cre<sup>+</sup>*))  
278 were mounted upside down (Fig. 4B,C) due to the specific insertion mechanism of the  
279 high-pressure freezing machine (HPM)100. The sapphire disc of 6 mm Ø and 0.12 mm  
280 thickness (Leica Microsystems, Wetzlar, Germany) was placed into a sample holder  
281 middle plate with a rim of 0.2 mm (Leica Microsystems, Wetzlar, Germany). Thereafter,  
282 the first 6 mm Ø and 0.2 mm thick spacer ring (Leica Microsystems, Wetzlar, Germany)  
283 was placed, forming a cavity. The freshly dissected organ of Corti was then placed into  
284 this cavity that was filled with extracellular solution. The dissection and extracellular  
285 solutions had the same composition as the solutions used for patch-clamp recordings  
286 (see above). The 0.2 mm side of the 6 mm Ø type A aluminum carrier (Leica  
287 Microsystems, Wetzlar, Germany) was placed onto the sample firmly. Next, the second  
288 spacer ring of the same dimensions as the first one was placed over the carrier, making  
289 a 1.02 mm sample enclosure. Finally, the samples were sandwiched between two  
290 transparent cartridges (Leica Microsystems, Wetzlar, Germany). The sample sandwich

291 was then flipped 180° during the insertion process allowing the sample to face towards  
292 the light source inside the HPM100.

### 293 Setup for stimulation and freezing relay

294 The HPM100 (Leica Microsystems, Wetzlar, Germany) is equipped with a trigger box and  
295 an optical fiber that reaches the freezing chamber inside the machine (Fig. 4A). The  
296 HPM100 allows immediate initiation of the freezing process after loading the sample on  
297 the cartridge mount and pressing the *process* button of the HPM100. However, the  
298 company configuration does not provide a precise temporal control of the freezing  
299 process onset immediately after the light stimulation is over. Therefore, we installed an  
300 external control for the blue light-emitting diode (LED) stimulation and subsequent  
301 freezing process initiation. This setup had three key functionalities: (i) external control of  
302 the *stimulus* onset and duration; (ii) precise control of the time point at which the freezing  
303 process initiates by interfacing with the optical trigger box (account for *HPM start* and  
304 *HPM delays* from the start); (iii) command relay to the *accelerometer*, the *pneumatic*  
305 *pressure sensor* and the *microphone* to detect the mechanical and acustical processes  
306 within the HPM till the end of the freezing process (Fig. 4A, Fig. 5).

307 To have an external control of the irradiance and duration of the light stimulation used for  
308 Opto-HPF (Fig. 4B,C), a *LLS-3* LED blue light (A20955; 473 nm) source (Schott and  
309 Moritex) was used for stimulation. *LLS-3* allowed the distinction between manual (by  
310 intensity control knob, which is maintained at 0) and automated intensity control (through  
311 *RSS-232* input). The latter was used with 80 mV selected as the command voltage (see  
312 calibration of irradiance at sample below). A *PCI 6221* interface card (37 pins, National  
313 Instrument, NI) and a RS232 interface was used to communicate the external LED control  
314 box to the computer. This allowed to control the amplitude and duration of the light pulse  
315 via the computer interface (Source code 3). A flexible optical fiber (Leica Microsystems,  
316 Wetzlar, Germany) transmitted the blue light from the source to the sample inside the  
317 freezing chamber of the HPM.

318 The *START remote port* of the optical trigger box was connected to the HPM100 via the  
319 *J3* cable. This allowed to *START* and *PAUSE* the freezing process externally (either  
320 manually or automatically). Light pulse duration could be defined manually or

321 automatically via the computer interface to have different light stimulation durations of the  
322 specimen.

### 323 Irradiance measurements for the HPM100

324 In order to be able to determine the light irradiance that reaches the sample, the inside of  
325 the HPM freezing chamber was replicated in an in-house workshop. In this chamber copy,  
326 the sample carriers with the upper half-cylinder are included, as well as the LED light  
327 source. The exact angle and distances of the original machine are fully replicated based  
328 on the technical drawing kindly provided by Leica Microsystems.

329 The radiant flux ( $\Phi_e$ ) measurement involves two main custom-made components, a  
330 mechano-optical arrangement and an optical detector. As optical detector, we used a  
331 combination of a bare photodiode (First Sensor, PS100-6 THD) and an operational  
332 amplifier circuit (operational amplifier: Burr Brown, OPA 637). It incorporates negative  
333 voltage bias over the photodiode and a low noise setting due to relative strong current  
334 feedback. The photodiode was covered with a neutral density (ND) filter (5%  
335 transmission) and brought as close as possible to the sample plane (Fig. 4D, upper  
336 panel). The ND filter was necessary to do not drive the circuit into saturation. The whole  
337 detector arrangement was calibrated with a laser light source emitting at 488 nm, which  
338 corresponds to the center wavelength of the LED source. In more detail, the calibration  
339 was performed with an expanded beam that fits well on the active area of the photodiode  
340 and a ND filter with calibrated transmission (active area: 10 x 10 mm). The radiant flux  
341 can be calculated from the detector output voltage ( $U$ ) with the linear equation:

$$342 \Phi_e(U) = 0.67 + 0.64 [mW/V] * U [V] * 20$$

343 The light distribution measurements were performed by imaging scattered excitation light  
344 in the sample plane (Fig. 4C). For imaging, we used two Achromates ( $f = 50 \text{ mm}$ ) in a  
345 configuration with a magnification factor of 1:1 and a CCD camera (IDS, UI-3250ML-M-  
346 GL) as detector (Fig. 4D, lower panel). The spatial irradiance distribution (Fig. 4F) is  
347 derived by transferring the gray values of the image (Fig. 4E; source code 4) into a  
348 radiometric magnitude. Here, we determined the intensity of each pixel ( $E_e/p$ ). First, the  
349 intensity per gray value ( $gv$ ) increment was calculated by normalizing the sum of the gray  
350 values (- background) in the imaged area to the measured radiant flux ( $\Phi_e$ ). By multiplying  
351 the  $gv$  of each pixel, we determined the intensity per pixel

352 
$$\frac{E_e}{p} = \frac{\Phi_e}{\sum_{x,y=1}^{n,m} gv_{xy}} * gv$$

353 The radiant flux at the sample was measured to be 37.3 mW with a peak irradiance of 6  
354 mW/mm<sup>2</sup> at the center of the chamber (Fig. 4F).

### 355 Installing additional sensors at the HPM100

356 The HPM100 initiates the freezing process directly after loading the sample (for further  
357 details, refer to <https://www.leica-microsystems.com>) but does not precisely trigger and  
358 monitor the freezing process on an absolute millisecond time scale regarding the  
359 externally initiated *HPM start*. The internal pressure and temperature sensors of the  
360 HPM100 offer a freezing curve for each sample with the precise values for temperature  
361 and pressure development inside the freezing chamber. These values are stored on a  
362 USB stick and are available as an excel file. This internal recording only starts when the  
363 internal pressure measured in the freezing chamber reaches 65 bar and, therefore, it does  
364 not provide the absolute time elapsed between *HPM start* (t = 0) and the time point when  
365 the sample is frozen. We incorporated three external sensors, (i) an *accelerometer*, (ii) a  
366 *microphone*, and (iii) a *pneumatic pressure sensor* (Fig. 4, Fig. 5, description see below).  
367 These additional sensors allowed us to calculate the absolute time scale from the *HPM*  
368 *start* till the sample reaches 0°C (assumed as “frozen”) for each shot (Fig. 5).

#### 369 *Accelerometer*

370 The accelerometer from Disynet GmbH (Germany) was externally installed under the  
371 HPM100 in order to detect vibration caused during the whole process from sample  
372 insertion till pressure release.

#### 373 *Microphone*

374 A microphone (MKE2, Sennheiser electronic GmbH & Co, Germany) was installed inside  
375 the machine close to the freezing chamber in order to detect acoustic signal changes  
376 during the process from sample insertion till pressure release.

#### 377 *Pneumatic pressure sensor*

378 The pneumatic pressure sensor (pressure sensor type A-10, WIKA, Germany; different  
379 from the HPM100 internal pressure sensor sitting inside the freezing chamber) was  
380 installed below the pneumatic needle valve, which opens at 7 bar (pneumatic pressure  
381 valve) to regulate the LN<sub>2</sub> entry in the freezing chamber. The pneumatic pressure sensor

382 detects the pneumatic pressure build-up and reveals the exact time point when the valve  
383 opens and the pneumatic pressure drops. This sensor is controlled by the same external  
384 control unit that also triggers the start of the HPM and was proven to be the most reliable  
385 readout to correlate freezing of the samples to the stimulation.

386 The absolute time scale (in ms) was correlated to the typical pressure curve inside the  
387 freezing chamber. This curve shows a pressure build-up (critical pressure of 1700 bar),  
388 followed by a plateau during freezing, and finalized by a rapid pressure drop. The  
389 temperature curve, detected by the internal thermal sensor, on the other hand shows a  
390 steady drop of the temperature (Fig. 5). These curves obtained from the internal sensors  
391 (pressure and temperature inside the freezing chamber) were correlated to the signals  
392 obtained from the three external sensors, whereby the pneumatic pressure sensor  
393 delivered a clear characteristic signal at the beginning of the pressure build-up (Fig. 5C;  
394 source code 5). The recordings from the external sensors start when *HPM start* ( $t = 0$ )  
395 (Fig. 5).

#### 396 **Opto-HPF and freezing procedure**

397 When the HPM was ready for freezing (showing “ready for freezing” on the HPM display),  
398 the freezing process was halted externally by pressing *PAUSE* on the trigger box (Leica  
399 Microsystems, Wetzlar, Germany). Subsequently, the sample sandwich was mounted as  
400 described above (Fig. 4B,C) and inserted into the HPM. By pressing the *START (HPM*  
401 *start: t = 0)* command (undoing the *PAUSE* command), the process was resumed: the  
402 sample was stimulated for the duration chosen with the installed computer interface and  
403 the freezing proceeded to completion.

404 Several factors need to be considered to precisely calculate the time point when the  
405 sample is frozen after *HPM start*. This delay, referred as  $T_{HPM\ delay\ from\ START}$ , is a sum of  
406 the delays caused by LN<sub>2</sub> compression and entry, mechanical processes inside the  
407 machine (e.g. placing the cartridge in the freezing chamber, valve openings) and  
408 specimen freezing. It is the full time it requires from initiating the freezing process by  
409 pressing *START* till the time point, when the sample is frozen. A good quality of freezing  
410 requires a steep pressure-increase and rapid temperature-drop inside the freezing  
411 chamber. Since these parameters vary for each shot, it is critical to measure them to  
412 accurately calculate  $T_{HPM\ delay\ from\ START}$ . Furthermore, the time for pressurizing LN<sub>2</sub>

413 strongly relies on mechanical processes inside the machine and therefore is variable, too.  
414 According to the HPM100 manual, the time to pressurize the LN<sub>2</sub> ( $T_{N_2 \text{ pressurized}}$ ) is around  
415 ~400 ms after *HPM start*. Once LN<sub>2</sub> reaches the required pressure, the pneumatic needle  
416 valve opens to let LN<sub>2</sub> inside the freezing chamber. The external pneumatic pressure  
417 sensor detects these changes in pneumatic pressure outside the freezing chamber (Fig.  
418 5A,B). The recorded pneumatic pressure curve shows a small dip (Fig. 5C, inset, asterisk)  
419 before the final steady increase and sudden drop. This small dip in the pressure reflects  
420 the opening of the valve. This pressure dip recorded by the external sensor can be  
421 correlated to the pressure buildup recorded by the internal sensor in the freezing chamber.  
422 This correlation sets the absolute time axis and determines the duration of the mechanical  
423 delays prior to freezing ( $T_{mechanics}$ ). We also account for the time required for the specimen  
424 to reach 0°C ( $T_{specimen \text{ at } 0}$ ). The exact temperature at the specimen cannot be monitored  
425 (Watanabe et al., 2013b), as the internal *thermal sensor* only provides the information of  
426 the temperature at the freezing chamber. In our HPM100 instrument, the freezing  
427 chamber reached 0°C ( $T_{chamber \text{ at } 0}$ ) at  $5.41 \pm 0.26$  ms (SD) on average. This parameter  
428 was calculated from the summation of *rise time* and *shift* ( $p/T$ ) from 10 test shots, similarly  
429 to a previous report (Watanabe et al., 2013b). *Rise time* corresponds to the time required  
430 for the pressure to reach 2100 bar, while *shift*  $p/T$  describes the time required for the  
431 temperature to drop below 0°C in relation to the pressure rise. Further delays include the  
432 time required for the sapphire disc to cool down ( $T_{sapphire \text{ at } 0}$ ) (0.01 ms, as estimated in  
433 (Watanabe et al., 2013b)) and for the sample center to reach 0°C ( $T_{sample \text{ center at } 0}$ ) (1.1  
434 ms, as estimated in Watanabe et al., 2013b). Altogether, the specimen reaches 0°C in  
435 approximately 6.52 ms ( $T_{specimen \text{ at } 0} = T_{chamber \text{ at } 0} + T_{sapphire \text{ at } 0} + T_{sample \text{ center at } 0}$ ). This time  
436 might be an overestimation since we assume that the sample does not cool during the  
437 first ms after the chamber is filled with LN<sub>2</sub>, as stated previously (Watanabe et al., 2013b).  
438 Overall, we estimated the delay from *HPM start* as follow:

439  **$T_{HPM \text{ delay from START}}$**

440 =  $T_{N_2 \text{ pressurized}}$  +  $T_{mechanics}$  +  $T_{specimen \text{ at } 0}$

441 =  $T_{N_2 \text{ pressurized}}$  +  $T_{mechanics}$  + ( $T_{chamber \text{ at } 0}$  +  $T_{sapphire \text{ at } 0}$  +  $T_{sample \text{ center at } 0}$ ) = 400 + **individually**  
442 **determined per shot** + ~5.41 + 0.01 + 1.1 ( $\pm 0.26$  ms due to the variability of  $T_{chamber \text{ at}}$   
443  $0$ ).

444 Where  $T_{N2\text{ pressurized}} = 400\text{ ms}$ , and  $T_{\text{specimen at } 0} = 5.41 (\pm 0.26) + 0.01 + 1.1\text{ ms}$ .

445  $T_{\text{mechanics}}$  ranged between 25.4 to 41.6 ms, and was individually determined for each shot.

446 The  $T_{\text{HPM delay from START}}$  for our experiments ranged from 431.92 to 448.12 ms. The onset  
447 (StimStart) of a 100 ms light stimulus was set after 390 and 425 ms from *HPM start*. We  
448 subtracted StimStart from  $T_{\text{HPM delay from START}}$  to obtain the actual stimulation duration  
449 before freezing for each shot (Fig. 5D).

450  $\text{Stim} = T_{\text{HPM delay from START}} - \text{StimStart}$

451  $\text{ShortStim} = \text{HPM}_{\text{delay from START}} - 425\text{ ms}$

452  $\text{LongStim} = \text{HPM}_{\text{delay from START}} - 390\text{ ms}$

453 The light stimulation duration ranged between 17-25 ms for ShortStim and between 48-  
454 76 ms LongStim.

#### 455 Sample processing via freeze substitution, ultrathin sectioning and post-staining

456 Freeze substitution (FS) was performed in an EM AFS2 (Leica Microsystems, Wetzlar,  
457 Germany) according to published work (Chapochnikov et al., 2014; Jung et al., 2015a;  
458 Siksou et al., 2007; Vogl et al., 2015). Briefly, the samples were incubated for four days  
459 in 0.1% tannic acid in acetone at -90°C. Three washing steps with acetone (1 h each)  
460 were performed at -90°C. Then 2% osmium tetroxide in acetone was applied to the  
461 sample and incubated at -90°C for 7 h. The temperature was raised to -20°C (5°C/h  
462 increment) for 14 h in the same solution. The samples were then incubated at -20°C for  
463 17 h in the same solution. The temperature was further raised automatically from -20°C  
464 to 4°C for 2.4 h (10°C/h increment). When the temperature reached 4°C, the samples  
465 were washed in acetone three times (1 h each) and brought to room temperature by  
466 placing them under the fume hood. Finally, the samples were infiltrated in epoxy resin  
467 (Agar 100, Plano, Germany). The next day, the samples were embedded in fresh 100%  
468 epoxy resin and polymerized at 70°C for 48 h in flat embedding moulds.

469 After trimming, 70 nm ultrathin sections were obtained using a UC7 ultramicrotome (Leica  
470 Microsystems, Wetzlar, Germany) with a 35° diamond knife (DiAtome, Switzerland).  
471 These sections were used to control for freezing quality and find the region of interest, or  
472 to perform pre-embedding immunogold labeling. For ET, semithin 250 nm sections were  
473 obtained. Post-staining was performed with 4% uranyl acetate in water or uranyl acetate  
474 replacement solution (Science Services, EMS) for 40 min and briefly (< 1 min) with



475 Reynold's lead citrate in a closed staining compartment in the presence of NaOH to  
476 exclude atmospheric CO<sub>2</sub> and avoid lead precipitates. After that, grids were washed two  
477 times on water droplets with previously boiled and cooled distilled water.

#### 478 [Transmission electron microscopy and electron tomography](#)

479 To check pre-embedding immunogold labeling and the quality of the tissue, 2D electron  
480 micrographs were taken from 70 nm ultrathin sections at 80 kV using a JEM1011 TEM  
481 (JEOL, Freising, Germany) equipped with a Gatan Orius 1200A camera (Gatan, Munich,  
482 Germany). In the 250 nm sections, we further controlled for artifact-free tomograms,  
483 whereby samples with poor tissue integrity and freezing artifacts at the AZ were excluded.  
484 These freezing artifacts were identified by the formation of long filamentous artifacts in  
485 the cytoplasm and nucleus of the IHCs. Additionally, only tomograms with a continuous  
486 AZ, a clear synaptic cleft and round-shaped SVs were analyzed.

487 *Electron tomography* was performed as described previously (Chakrabarti et al., 2018;  
488 Wong et al., 2014). Briefly, 10 nm gold beads (British Bio Cell/Plano, Germany) were  
489 applied to both sides of the stained grids. For 3D, tilt series were acquired at 200 kV using  
490 a JEM2100 TEM (JEOL, Freising, Germany) mostly from -60° to +60° with a 1° increment  
491 at 12,000× using the Serial-EM software package (Mastronarde, 2005) with a Gatan Orius  
492 1200A camera (Gatan, Munich, Germany). Tomograms were generated using the IMOD  
493 package etomo (Kremer et al., 1996).

#### 494 [Model rendering and image analysis](#)

495 Tomograms were segmented semi-automatically using 3dmod (Kremer et al., 1996) with  
496 a pixel size of 1.18 nm. The presynaptic AZ membrane was defined by the area occupied  
497 by a clear postsynaptic density (PSD) as well as a regular synaptic cleft. The AZ  
498 membrane of a ribbon synapse was then assigned as a closed object and manually  
499 segmented every 15 virtual sections for 5 consecutive virtual sections and then  
500 interpolated across the Z-stack. The synaptic ribbons and the presynaptic density were  
501 also assigned as closed objects and were manually segmented for the first 10, middle 20  
502 and last 10 virtual sections and then interpolated across the Z-stack using the interpolator  
503 tool of 3dmod. Interpolation was corrected manually in each virtual section thereafter.

504 MP-SVs were defined as the vesicles localized in the first row from the AZ-membrane,  
505 with a maximum 50 nm membrane-to-membrane distance vertically to the AZ-membrane  
506 (Fig. 6-figure supplement 1A, upper panel) and with a maximum lateral distance (vesicle  
507 outer edge) of 100 nm to the presynaptic density (Fig. 6-figure supplement 1A, lower  
508 panel) (Chakrabarti et al., 2018; Jung et al., 2015a). The distances of the SVs to the  
509 presynaptic density or the AZ membrane were measured using the “*Measure*” drawing  
510 mode in IMOD’s GUI “*3dmod*”. RA-SVs were defined as the first row of SVs with a  
511 maximal distance of 80 nm from the ribbon surface to the vesicle membrane in each  
512 tomogram (Fig. 6-figure supplement 1A, upper panel).

513 All round vesicles were annotated using a spherical scattered object at its maximum  
514 projection in the tomogram, marking the outer leaflet of the vesicles. The diameter of the  
515 sphere was adjusted for each vesicle. The vesicles radius ( $r$ ) were determined  
516 automatically (Helmprobst et al., 2015) using the program imodinfo option  $-p$  of IMOD  
517 software package (Kremer et al., 1996). Then the diameter ( $D$ ) was computed with  $D =$   
518  $2r$ . All outputs were obtained in nm/tomogram.

## 519 Data analysis

520 Electrophysiological data was analyzed using the IgorPro 6 software package  
521 (Wavemetrics; RRID:SCR\_000325), Patcher’s Power Tools (RRID:SCR\_001950) and a  
522 custom-written script (source code 2). Evoked photocurrents and photodepolarizations  
523 were estimated from the peak of current and depolarization, respectively, following the  
524 light pulse. Time to peak was calculated from the onset of the light stimulus to the peak  
525 of the photodepolarization. EPSCs amplitude and charge was computed from the onset  
526 of the light pulse until the end of the release. EPSCs latency was calculated from light-  
527 pulse<sub>onset</sub> until EPSC<sub>onset</sub> (corresponding to avg. baseline  $\pm 4$  SD) and the time of return  
528 to baseline was estimated by EPSC<sub>offset</sub>-EPSC<sub>onset</sub>.

529 Confocal sections were visualized using the FIJI software (Schindelin et al., 2012;  
530 RRID:SCR\_002285). The analysis of ribbon number using the z-projections of the stacks  
531 was performed in the IMARIS software using custom plug-ins (Source code 1) of IMARIS  
532 (RRID:SCR\_007370), whereby the number of ribbons within a region of interest (ROI)

533 was obtained using the Spots function. The average ribbons per IHCs was calculated by  
534 dividing the number of spots detected by the number of IHCs for each ROI.

535 For every dataset, the number of replicates (n) and number of animals (N) are indicated  
536 in the figure legend. Data sets were tested for normal distribution (Saphiro-Wilk test) and  
537 equality of variances (Brown-Forsythe test). For data sets following a normal distribution  
538 and with equality of variances, we used parametric statistical tests (one-way ANOVA and  
539 two-way ANOVA), followed by a post-hoc test for multiple comparisons (Tukey's test). For  
540 non-parametric data sets, we performed Kruskal-Wallis (KW) tests, followed by Dunn's  
541 test. For the SV diameter quantification (Fig. 7C), we also categorized SV diameters into  
542 bins similar to previous studies (Chakrabarti et al., 2018; Hintze et al., 2021). All statistical  
543 analyses and graphs were done using IGOR Pro software 6, GraphPad Prism  
544 (RRID:SCR\_002798) version 9 and/or R software (version 4.0.3).

545 Sample sizes were decided according to typical samples sizes in the respective fields  
546 (e.g. electrophysiology, electron tomography). The sample size for each experiment is  
547 reported in the main text, figures and figure captions.

#### 548 [Materials availability statement](#)

549 All research materials and biological reagents used in this paper are reported in the  
550 Materials and Method section. The custom routines and scripts used in the manuscript  
551 are provided as Source Codes:

552 Source Code 1: IMARIS custom plug-ins for the analysis of Figure 1D

553 Source code 2: Igor Pro custom-written analysis (*OptoEPSCs*) of light-evoked EPSCs  
554 related to Figure 3C-F.

555 Source code 3: MATLAB scripts (*HPMacquire*) for the computer interface to control the  
556 light pulse for Opto-HPF. Related to Figure 4A

557 Source code 4: MATLAB script (*Intensityprofilecalculator*) for the analysis of the  
558 irradiance in Figure 4E.

559 Source code 5: MATLAB scripts (*HPManalyse*) for the alignment of the data obtained  
560 from the Opto-HPF sensors. Related to Figure 5C.

561 The data files including the numerical data associated with the figures will be made  
562 available in osf upon acceptance.

563

## 564 Results

### 565 Verification of ChR2 expression in inner hair cells and long-term expression of 566 ChR2

567 First, we verified the expression of ChR2 in IHCs of both mouse lines, *Ai32VC cre<sup>+</sup>* and  
568 *Ai32KI cre<sup>+</sup>* (*fl/+ cre<sup>+</sup>* or *fl/fl cre<sup>+</sup>*), using immunofluorescence microscopy (Fig. 1A-C).  
569 Alexa-coupled anti-GFP antibodies detected the EYFP-tag of the ChR2 construct and  
570 showed a clear expression of the construct at the membrane. For better resolution, we  
571 also preformed immunogold electron microscopy (Fig. 1D) with pre-embedding gold-  
572 coupled anti-GFP nanobodies. Membrane expression of ChR2 was evenly distributed  
573 (Fig. 1D, arrow), confirming that ChR2 was efficiently expressed at the plasma membrane  
574 of IHCs without any apparent intracellular accumulation. Overall, these results confirmed  
575 that the *Vglut3* promoter efficiently controlled cre-recombination in ~99% of the analyzed  
576 IHCs for both mouse lines similarly to previous studies using *Vglut3 cre* mice (Jung et al.,  
577 2015b; Vogl et al., 2016). Therefore, we decided to pool the results from both genotypes  
578 in the following sections, but also analyzed and presented the data for each genotype in  
579 the Expanded View Figures.

580 Having confirmed proper ChR2 expression in both lines, in a next step, we analyzed  
581 potential long-term effects of ChR2 expression on synaptic organization of IHCs in the  
582 *Ai32KI* line. Using confocal microscopy, we compared ribbon synapse numbers of *Ai32KI*  
583 *cre<sup>+</sup>* IHCs with WT littermate controls at three different age intervals: 4-5 months (G1), 6-  
584 7 months (G2) and 9-12 months (G3) (Fig. 1, Fig. 1-figure supplement 1, all values can  
585 be found in Table 2). WT IHCs showed the characteristic decline in the number of ribbon  
586 synapses associated with aging (WT G1 =  $9.82 \pm 0.87$  vs WT G3 =  $6.39 \pm 0.56$ ;  $p =$   
587  $0.0077$ ) (Parthasarathy and Kujawa, 2018; Sergeyenko et al., 2013). Comparably, ChR2-  
588 expressing IHCs showed a significant decline in the number of ribbon synapses at 6-7  
589 months and 9-12months in comparison to 4-5 months, (*Ai32KI cre<sup>+</sup>* G1 =  $8.97 \pm 0.48$  vs  
590 *Ai32KI cre<sup>+</sup>* G2 =  $5.324 \pm 0.43$ ;  $p < 0.0001$ ; vs *Ai32KI cre<sup>+</sup>* G3 =  $5.69 \pm 0.42$ ;  $p = 0.0005$ ).  
591 Importantly, there were no differences in the number of ribbons between ChR2-  
592 expressing IHCs and WT from the same age groups. We therefore conclude that ChR2  
593 expression does not alter the number of ribbon synapses arguing against adverse effects  
594 such as through a potential chronic ChR2-mediated depolarization.

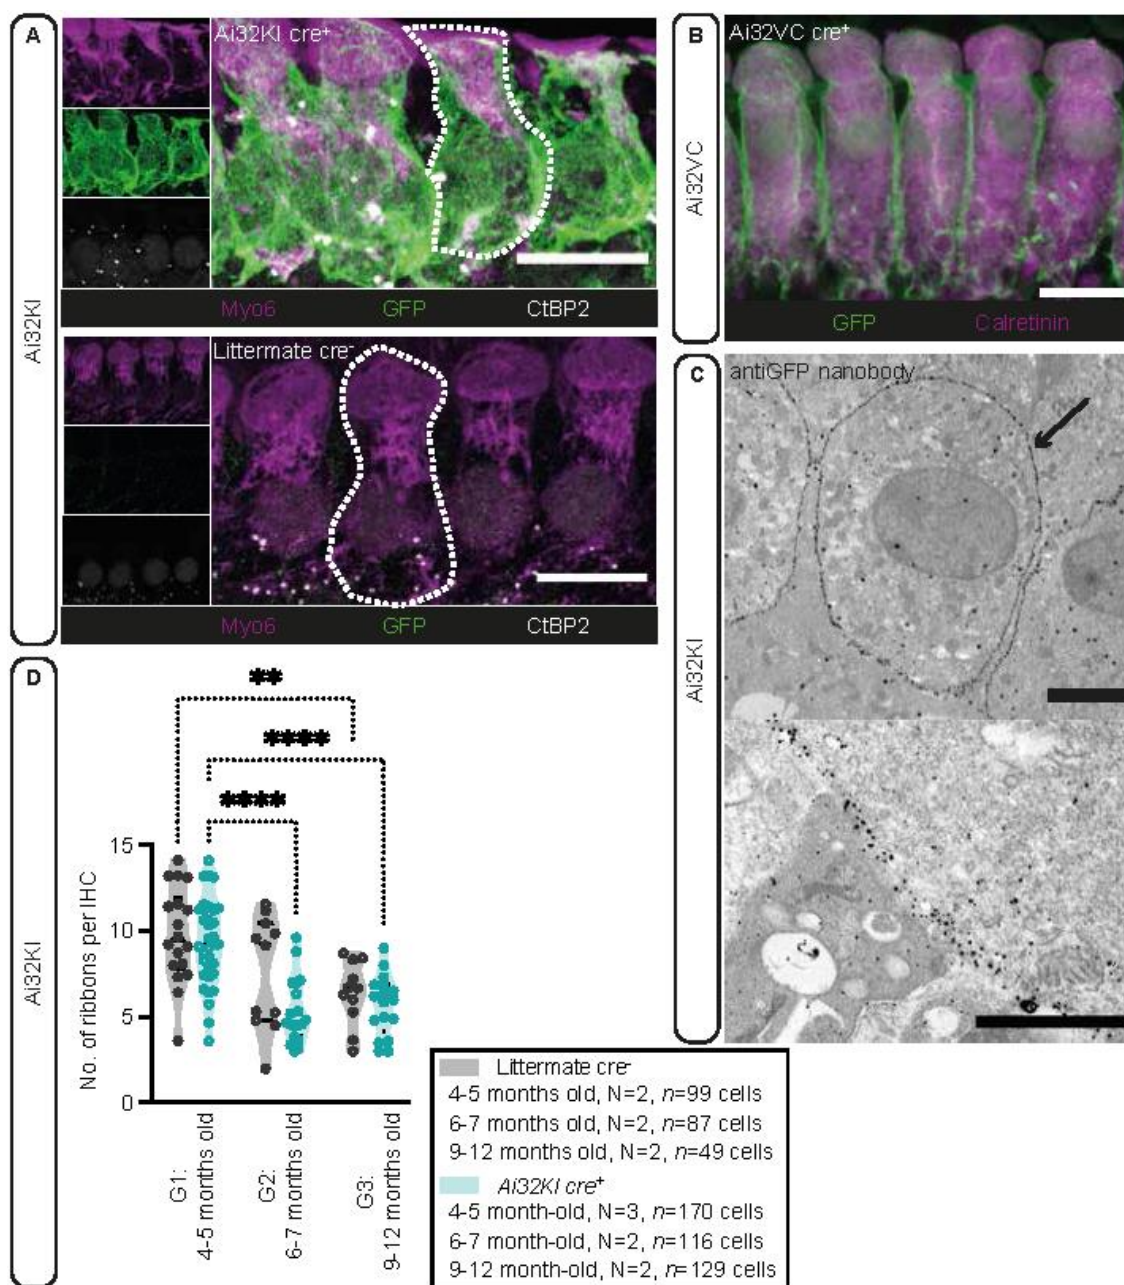

595  
596

### Figure 1 Plasma membrane expression of ChR2 in IHCs

597 **(A)** IHCs express ChR2 in the plasma membrane. Maximal projection of confocal z-stacks from  
598 the apical turn of the anti-GFP labeled organ of Corti from a 4-5 months-old *Ai32KI cre<sup>+</sup>* mice  
599 (upper panel) and its littermate control (WT) (lower panel). Myo6 (magenta) was used as  
600 counterstaining and CtBP2 labeling shows ribbons at the basolateral zone of IHCs (examples  
601 outlined). ChR2 expression (green) is observed along the surface of *Ai32KI cre<sup>+</sup>* IHCs (upper  
602 panel) but not in WT IHCs (lower panel). Scale bar, 10  $\mu$ m. **(B)** Maximal intensity projection of  
603 *Ai32VC cre<sup>+</sup>* IHCs expressing ChR2-EYFP construct. Calretinin immunostaining was used to  
604 delineate the IHC cytoplasm. Scale bar, 10  $\mu$ m. **(C)** Pre-embedding immunogold labeling for  
605 electron microscopy performed with a gold-coupled anti-GFP nanobody recognizing the EYFP of  
606 the ChR2 construct. A clear localization at the plasma membrane of IHCs is visible (arrow, upper

607 panel). Scale bar, 2  $\mu\text{m}$ . Magnification of the membrane labeling is shown in the lower panel.  
608 Scale bar, 1  $\mu\text{m}$ . (D) The average number of ribbons per IHC is similar between ChR2-expressing  
609 IHCs and WT IHCs. Both *Ai32KI cre<sup>+</sup>* and WT mice showed a comparable decrease in the number  
610 of ribbons with age (\*  $p < 0.05$ ; \*\*  $p < 0.01$ ; \*\*\*\*  $p < 0.0001$ ; two-way ANOVA followed by Tukey's  
611 test for multiple comparisons). Violin plots show median and quartiles with data points overlaid.

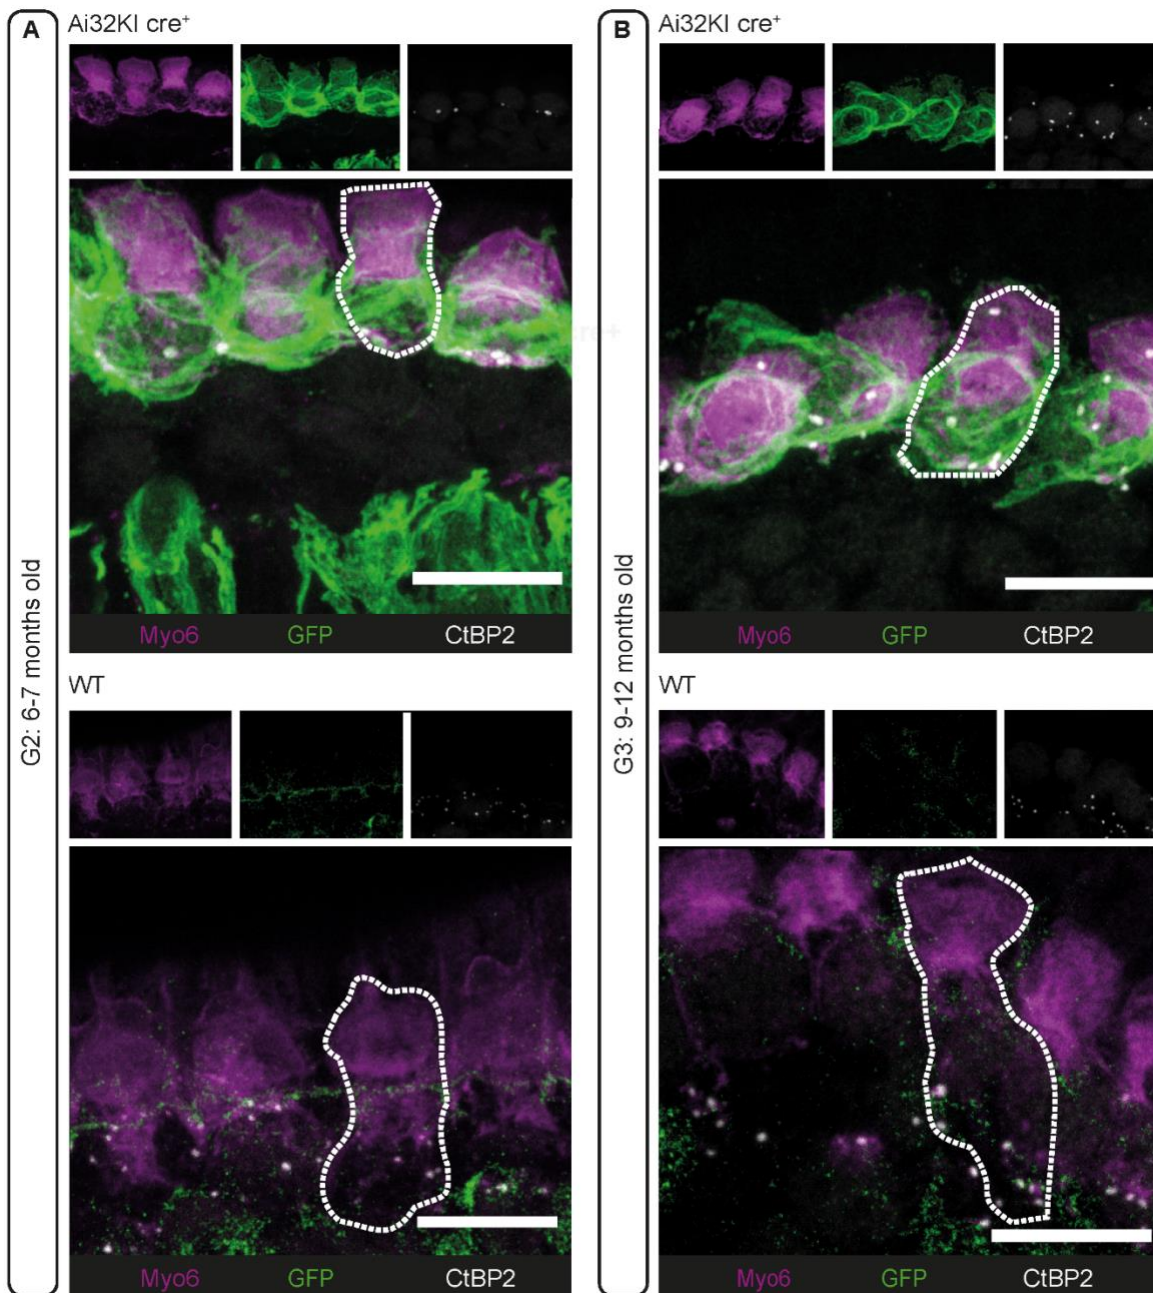

612  
613 **Figure 1-figure supplement 1 Long term expression of ChR2 at IHC plasma membrane**  
614 Maximal projection of confocal z-stacks of (A) G2 (6-7 months-old mice) and (B) G3 (9-12 months-  
615 old mice) IHCs from the apical turn of organs of Corti from ChR2-expressing mice (*Ai32KI cre<sup>+</sup>*;  
616 upper panels) and their respective controls (*WT*; lower panels). Some IHCs are outlined with a  
617 dotted line. ChR2 expression at the membrane is visualized by GFP labeling (green). Myo6

618 (magenta) immunostaining was used to delineate the IHC and Ctbp2 to visualize the ribbons  
 619 (white). Ectopic GFP expression (A, upper panel) in spiral ganglion fibers is indicative of  
 620 unspecific *cre* recombination (see Materials & Methods). Scale bars, 10  $\mu$ m.  
 621

|                                   | N<br>animals | N<br>ROIs | n<br>cells | Ribbon<br>count (mean<br>$\pm$ SEM) | Age comparison                                                                |               | Genotype comparison                             |               |
|-----------------------------------|--------------|-----------|------------|-------------------------------------|-------------------------------------------------------------------------------|---------------|-------------------------------------------------|---------------|
|                                   |              |           |            |                                     | p-value                                                                       | Test          | p-value                                         | Test          |
| WT G1                             | 2            | 12        | 99         | 9.82 $\pm$ 0.87                     | **, WT G1 vs. WT G3                                                           |               | ns, WT G1 vs. <i>Ai32KI cre</i> <sup>+</sup> G1 |               |
|                                   |              |           |            |                                     | 0.0077                                                                        | Two-way ANOVA | 0.9124                                          | two-way ANOVA |
| WT G2                             | 2            | 11        | 87         | 7.60 $\pm$ 0.99                     | ns, WT G2 vs. WT G1                                                           |               | ns, WT G2 vs. <i>Ai32KI cre</i> <sup>+</sup> G2 |               |
|                                   |              |           |            |                                     | 0.2045                                                                        | two-way ANOVA | 0.1046                                          | two-way ANOVA |
| WT G3                             | 2            | 11        | 65         | 6.39 $\pm$ 0.56                     | ns, WT G3 vs. WT G2                                                           |               | ns, WT G3 vs. <i>Ai32KI cre</i> <sup>+</sup> G3 |               |
|                                   |              |           |            |                                     | 0.8179                                                                        | two-way ANOVA | 0.9689                                          | two-way ANOVA |
| <i>Ai32KI cre</i> <sup>+</sup> G1 | 3            | 21        | 170        | 8.97 $\pm$ 0.48                     | ****, <i>Ai32KI cre</i> <sup>+</sup> G1 vs. <i>Ai32KI cre</i> <sup>+</sup> G2 |               |                                                 |               |
|                                   |              |           |            |                                     | <0.0001                                                                       | two-way ANOVA |                                                 |               |
| <i>Ai32KI cre</i> <sup>+</sup> G2 | 2            | 19        | 116        | 5.32 $\pm$ 0.43                     | ns, <i>Ai32KI cre</i> <sup>+</sup> G2 vs. <i>Ai32KI cre</i> <sup>+</sup> G3   |               |                                                 |               |
|                                   |              |           |            |                                     | 0.9968                                                                        | two-way ANOVA |                                                 |               |
| <i>Ai32KI cre</i> <sup>+</sup> G3 | 2            | 17        | 129        | 5.69 $\pm$ 0.42                     | ****, <i>Ai32KI cre</i> <sup>+</sup> G3 vs. <i>Ai32KI cre</i> <sup>+</sup> G1 |               |                                                 |               |
|                                   |              |           |            |                                     | 0.0005                                                                        | two-way ANOVA |                                                 |               |

622 **Table 2 Ribbon counts in three different age groups of ChR2-expressing IHCs and their WT**  
 623 **controls**

624 Data are presented as mean  $\pm$  SEM. p-values are calculated by two-way ANOVA followed by  
 625 Tukey's test for multiple comparisons. Results of the comparisons between age groups of the  
 626 same genotype and between genotypes of the same age group are reported. Significant results  
 627 are indicated with \* p < 0.05; \*\* p < 0.05; and \*\*\*\* p < 0.0001.  
 628

## 629 Depolarization of IHCs using optogenetics

630 To validate optogenetic stimulation of IHCs, we performed perforated patch-clamp  
 631 recordings of ChR2-expressing IHCs and applied 473 nm light pulses of different  
 632 durations and intensities. Evoked photocurrents and photopotentials were measured in  
 633 voltage-clamp and current-clamp mode, respectively. We employed TEA-Cl and Cs<sup>+</sup> in  
 634 the bath solution in order to partially block K<sup>+</sup> channels and facilitate photodepolarization.  
 635 Compared to other compositions (Jaime Tobón, 2015), we found 20 mM TEA-Cl and 1

636 mM Cs<sup>+</sup> to support both sufficient amplitudes and acceptable decay kinetics of  
637 photodepolarization. Under these conditions, strong short light pulses of 5 ms depolarized  
638 the cell by more than 50 mV (i.e. going from a holding potential of -84 mV up to -30 mV;  
639 Fig. 2A). Longer light pulses of 10 and 50 ms caused stronger depolarizations even at  
640 low irradiances (Fig. 2B,C,D), even though the peak of photodepolarization was reached  
641 with considerable delays (Fig. 2E). On average, the peak was reached within 10-20 ms  
642 after the onset of the light pulse for irradiances above 1 mW/mm<sup>2</sup> (Fig. 2E). Higher  
643 irradiances decreased the time to peak of the photodepolarization for all stimulation  
644 durations. Light pulses of 10 ms at 7-16 mW/mm<sup>2</sup>, corresponding to the irradiance  
645 recorded at the HPM machine (Fig. 4E-F), could depolarize the IHC by 27-65 mV (Fig.  
646 2D). Notably, IHCs were photodepolarized by 20 mV within the first 3 to 10 ms of the light  
647 pulse, which presumably suffices to trigger vesicle release on IHCs (assuming a resting  
648 potential of -58 mV and based on release thresholds reported (Goutman and Glowatzki,  
649 2007; Özçete and Moser, 2020). The results obtained from both lines were comparable,  
650 as shown in Figure 2-figure supplement 1.



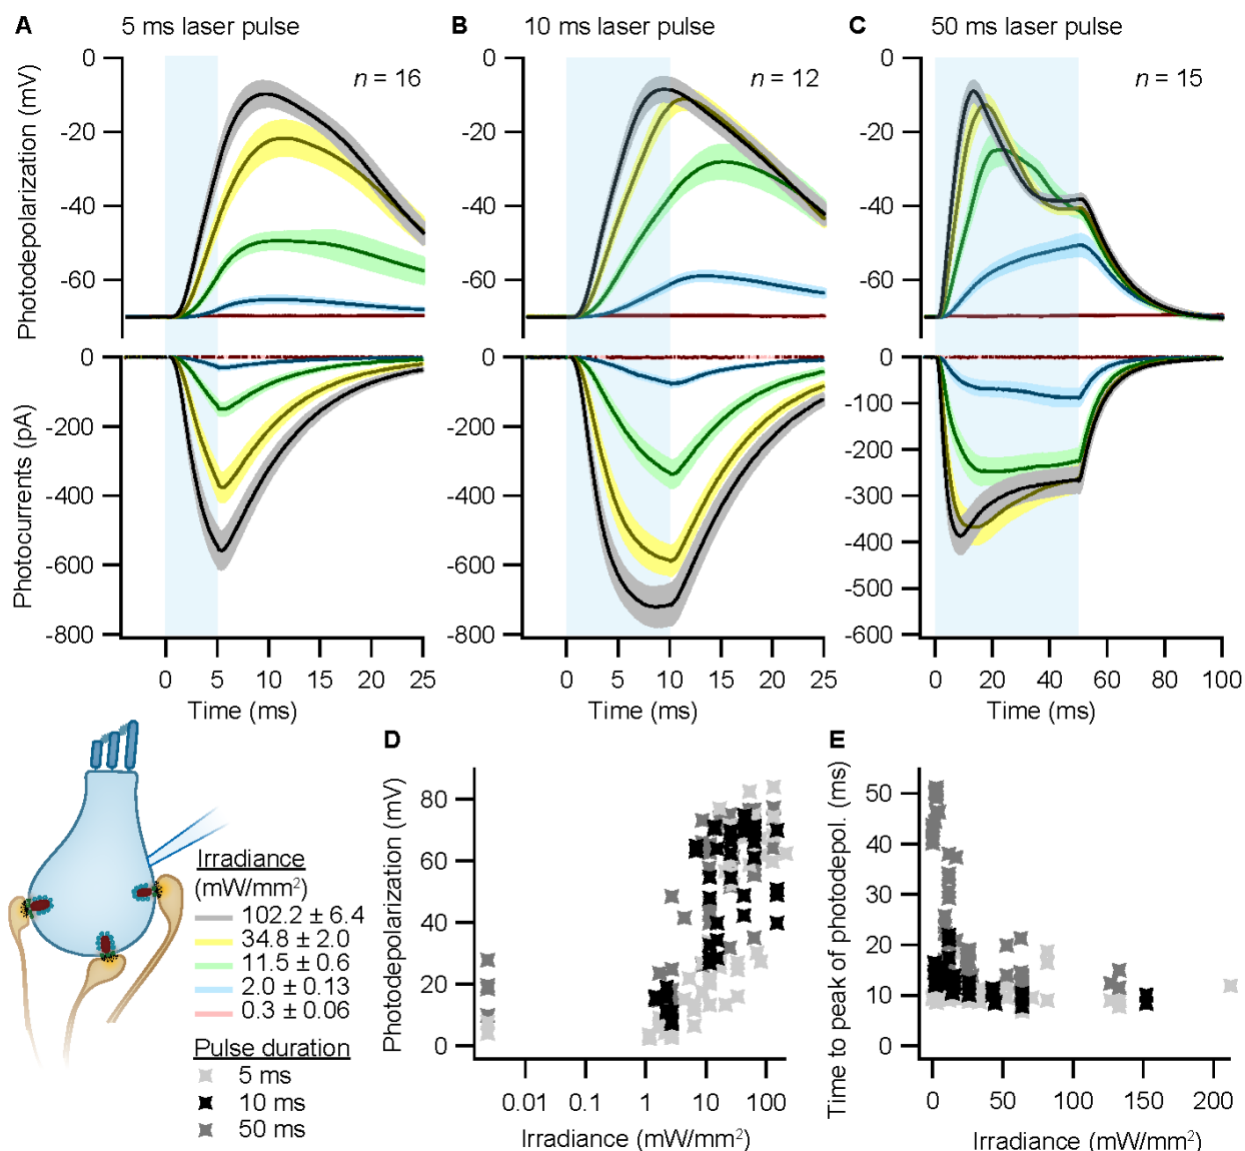

651

652 **Figure 2 Optogenetic depolarization of IHCs**

653 IHCs expressing ChR2 (*Ai32VC cre<sup>+</sup>* and *Ai32KI cre<sup>+</sup>*) were optogenetically stimulated by 473 nm  
 654 light pulses of increasing irradiance ( $\text{mW}/\text{mm}^2$ ). **(A-C)** Average photocurrents (lower panel) and  
 655 photodepolarizations (upper panel) of patch-clamped IHCs during 5 ms (A,  $n = 16$ ,  $N_{\text{animals}} = 7$ ),  
 656 10 ms (B,  $n = 12$ ,  $N_{\text{animals}} = 4$ ) and 50 ms (C,  $n = 15$ ;  $N_{\text{animals}} = 6$ ) light pulses of increasing  
 657 irradiances (color coded). Mean is displayed by the continuous line and  $\pm$  SEM by the shaded  
 658 area. **(D-E)** Peak of photodepolarization (D) and time to peak (E) obtained for increasing  
 659 irradiances of different lengths (light gray 5 ms, black 10 ms, dark gray 50 ms).

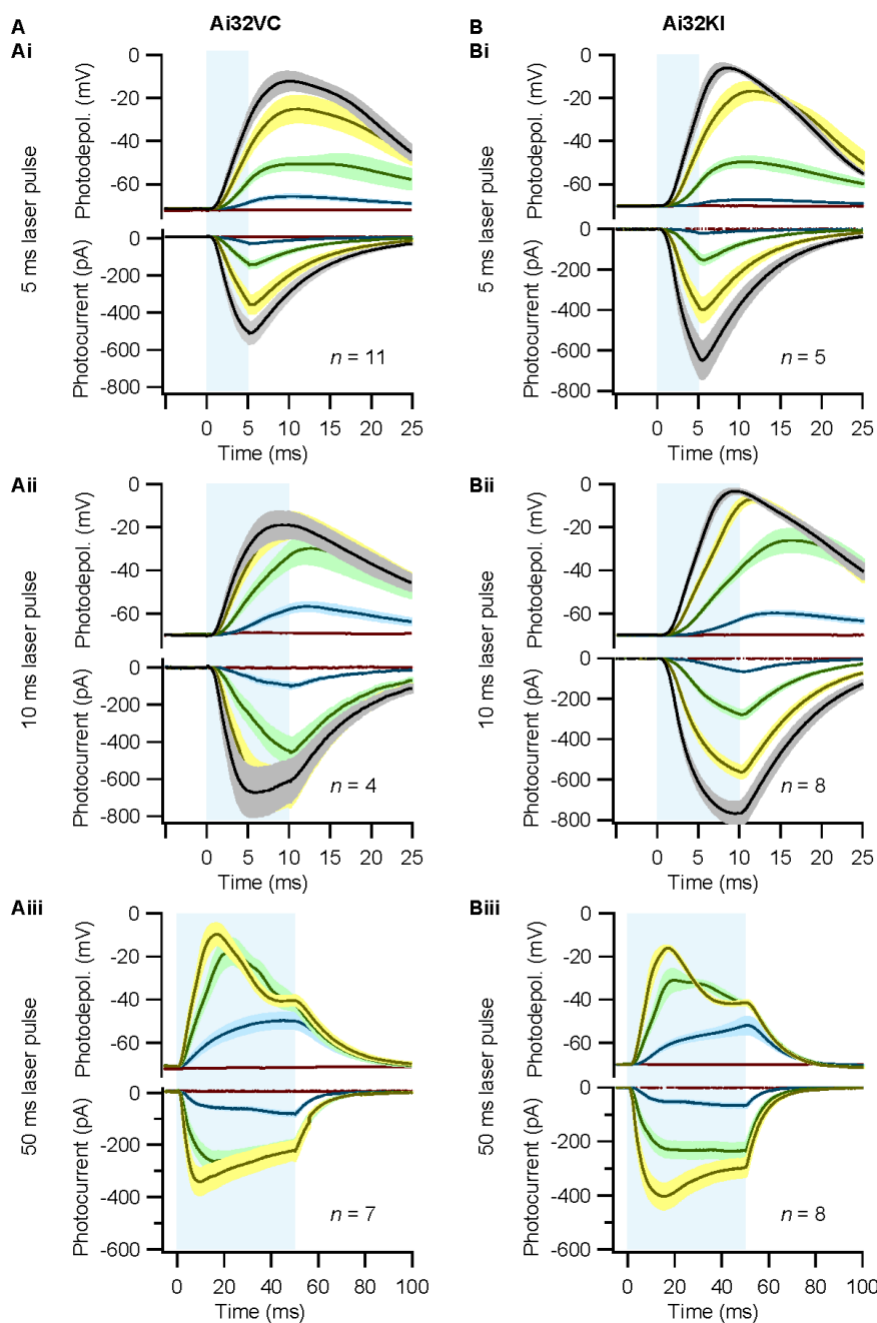

660

661 **Figure 2-figure supplement 1 Comparison of optogenetic stimulation of IHCs from *Ai32VC***  
 662 ***cre*<sup>+</sup> and *Ai32KI cre*<sup>+</sup> mice**

663 IHCs expressing ChR2 (*Ai32VC cre*<sup>+</sup> left and *Ai32KI cre*<sup>+</sup> right) were optogenetically stimulated  
 664 by 473 nm light pulses of increasing irradiance (mW/mm<sup>2</sup>). (A-C) Average photocurrents (lower  
 665 panel) and photodepolarizations (upper panel) of patch-clamped IHCs during 5 ms (A), 10 ms (B)  
 666 and 50 ms light pulses of increasing irradiances (color coded as in Fig. 2). Mean is displayed by  
 667 the continuous line and  $\pm$  SEM by the shaded area. For 5 ms:  $n_{Ai32VC} = 11$ ,  $N_{animals Ai32VC} = 6$ ;  $n_{Ai32KI}$   
 668  $= 5$ ,  $N_{animals Ai32KI} = 1$ . For 10 ms:  $n_{Ai32VC} = 4$ ,  $N_{animals Ai32VC} = 1$ ;  $n_{Ai32KI} = 8$ ,  $N_{animals Ai32KI} = 3$ . For 50  
 669 ms:  $n_{Ai32VC} = 7$ ,  $N_{animals Ai32VC} = 3$ ;  $n_{Ai32KI} = 8$ ,  $N_{animals Ai32KI} = 3$ .

670

671 To test whether our stimulation paradigms would prompt neurotransmitter release, we  
672 performed whole-cell patch-clamp recordings from individual afferent boutons contacting  
673 ChR2-expressing IHCs. Light pulses of low intensities and short duration were sufficient  
674 to trigger release from individual AZs, as proven by excitatory postsynaptic currents  
675 (EPSCs) recorded from three boutons contacting different IHCs (Fig. 3A). Consistent with  
676 previous experiments employing  $K^+$  or voltage-clamp stimulation of IHCs (e.g.  
677 Chapochnikov et al., 2014; Glowatzki and Fuchs, 2002; Goutman and Glowatzki, 2007),  
678 we found variable amplitudes of individual EPSCs. The maximum amplitude of the evoked  
679 EPSCs varied between different boutons (from -200 pA to -700 pA), but remained fairly  
680 similar for one individual bouton regardless of the light pulse duration (Fig. 3B). In  
681 contrast, light pulse duration had a major impact on the duration of the evoked EPSCs  
682 (i.e. the duration of exocytosis; Fig. 3C) and consequently, on the total charge transfer  
683 (Fig. 3D). In response to a 50 ms stimulation, the evoked release lasted three times longer  
684 than in response to a 10 ms light pulse and could reach up to double the initial charge  
685 transfer. In line with the recorded IHC photodepolarization, longer light pulses required  
686 lower intensities to trigger a response; 4 to 6  $mW/mm^2$  were sufficient for 50 ms light  
687 pulses. Moreover, as expected from the photodepolarization, EPSCs latency decreased  
688 with increasing irradiances (Fig. 3E). Finally, we quantified the maximal EPSCs charge  
689 transfer at 20 ms ( $Q_{20ms}$ ) and 50 ms ( $Q_{50ms}$ ) after the onset of the light pulses. These time  
690 points reflect phasic RRP release (20 ms) and sustained release (50 ms) of IHC ribbon  
691 synapses (Johnson et al., 2017; Michalski et al., 2017; Moser and Beutner, 2000). For  
692 light stimulations of 6-7  $mW/mm^2$ ,  $Q_{20ms}$  ranged from 236 pC up to 1300 pC while  $Q_{50ms}$   
693 ranged from 850 to 2450 pC. Importantly, the first recording of all three boutons showed  
694 substantial release exceeding 400 pC at these time points. The return to baseline differed  
695 among the 3 boutons and for pulse duration (Fig. 3F), but neurotransmitter release lasted  
696 for at least 15 ms. These electrophysiological findings demonstrate that the chosen  
697 stimulation paradigms are sufficient to trigger phasic and sustained SV exocytosis in  
698 ChR2-expressing IHCs.

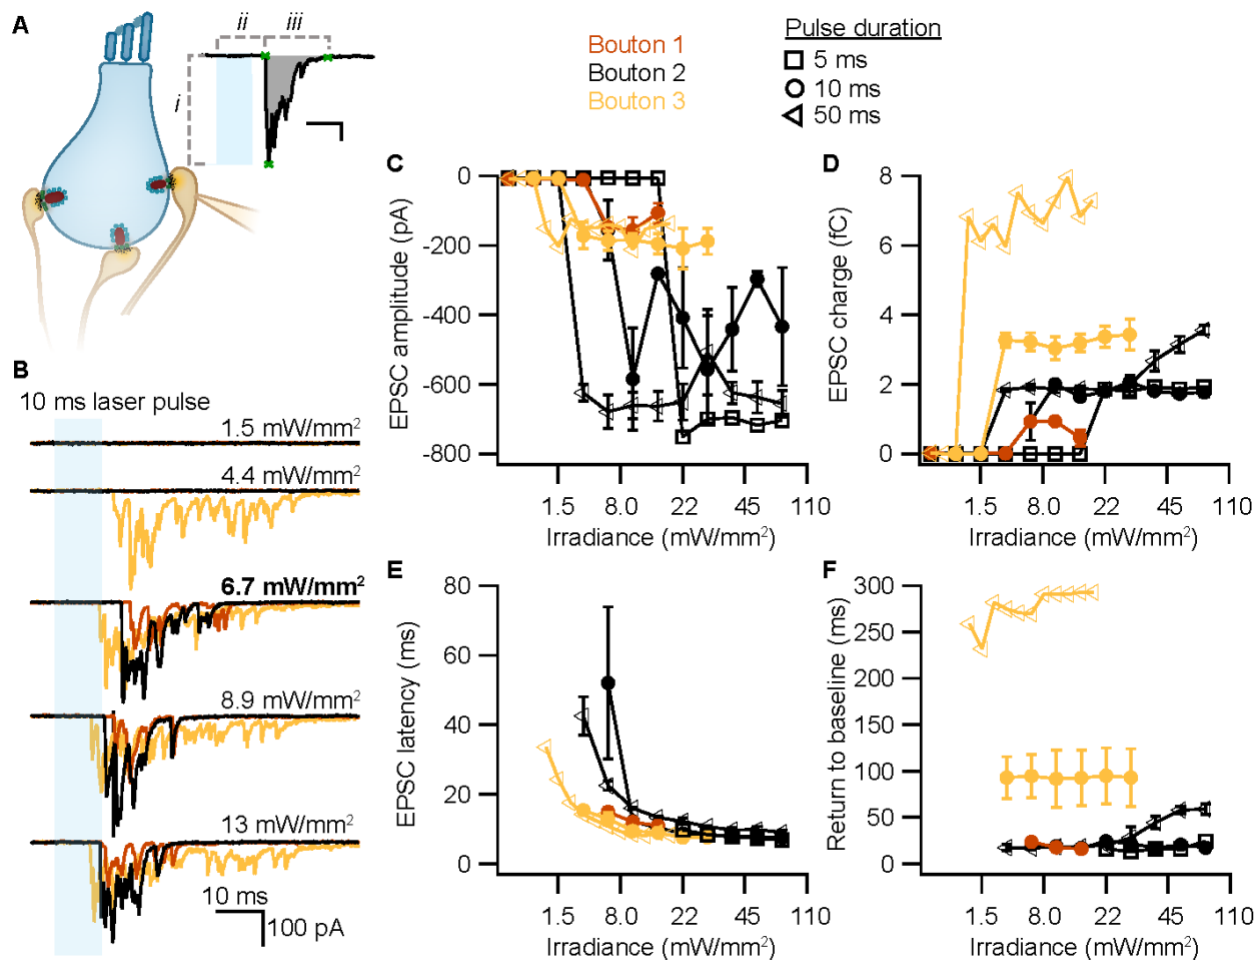

699

700 **Figure 3 Triggered exocytosis at individual ribbon synapses**

701 **(A)** Excitatory postsynaptic currents (EPSCs) upon the optogenetic stimulation of *Ai32VC cre<sup>+</sup>*  
 702 IHCs were recorded using whole-cell patch clamp of the contacting bouton. The response was  
 703 quantified in terms of amplitude (*i*), charge (gray area), latency (*ii*) and return to baseline (*iii*)  
 704 (Source code 2). Scale bar as in panel B. **(B)** Recorded EPSCs from three different postsynaptic  
 705 boutons (different colors) in response to increasing light intensities. **(C-F)** Amplitude (C), charge  
 706 (D), latency (E) and return to baseline (F) of the light triggered EPSCs to different pulse durations  
 707 (5 ms squares; 10 ms circles; 50 ms triangles).

708

709 **Developing a method to combine optogenetic stimulation with precisely timed**  
 710 **freezing**

711 To correlate structure and function, we performed Opto-HPF, followed by freeze-  
 712 substitution (FS) and subsequent ET (Fig. 4-figure supplement 1). The commercial  
 713 HPM100 comes with limitations: the light stimulation duration cannot be set precisely and  
 714 the precise time of freezing is not provided. Therefore, groups had previously already  
 715 modified the HPM100 with custom-made settings adapted to the needs of central

716 synapses (Watanabe et al., 2013a). Applying this method to a sensory synapse, which  
717 does not operate with all-or-nothing action potential stimulation, we established a more  
718 general framework for Opto-HPF using the HPM100.

#### 719 *Setup for stimulation and freezing relay*

720 First, we determined the irradiance that reaches the sample with a re-built chamber-copy  
721 equipped with an optical fiber. The radiant flux at the sample was measured to be 37.3  
722 mW with a peak irradiance of 6 mW/mm<sup>2</sup> where the samples are positioned (Fig. 4F).  
723 This irradiance is in accordance with the irradiance values that led to a sufficient  
724 depolarization of IHCs to trigger exocytosis in our cell-physiological experiments. With  
725 our custom-made setup, we controlled the irradiance, stimulus duration and the coupling  
726 of stimulus onset with the freezing of the specimen (Source code 3).

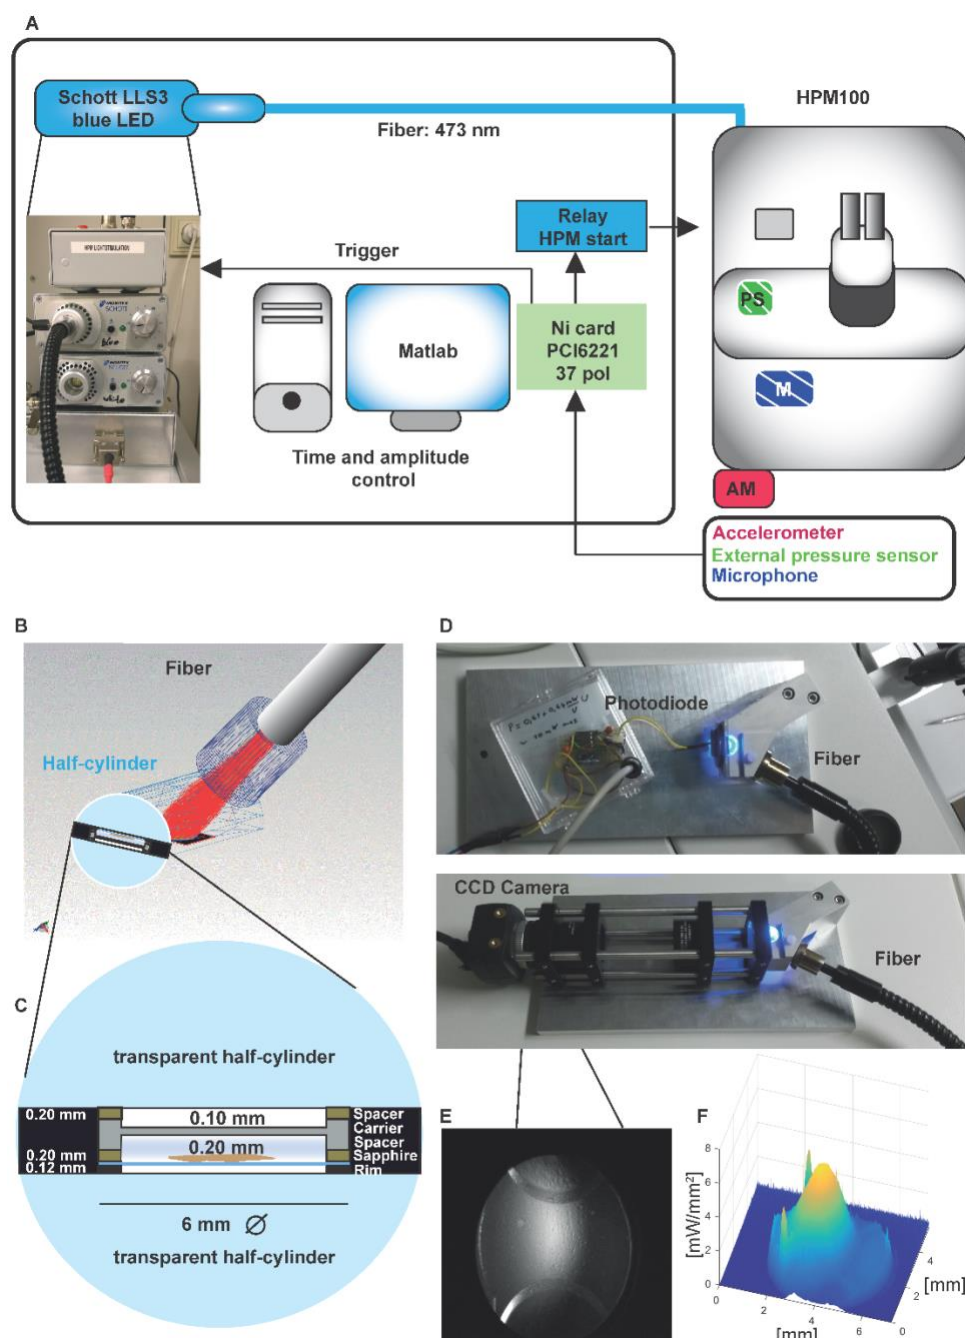

727

728

### Figure 4 Opto-HPM setup and irradiance calculation in the HPM

729

(A) Simplified illustration depicting the components of the external setup installed to control the light stimulation (irradiance and duration), to determine the time point of the freezing onset and command relay (blue, control unit) to the sensors (accelerometer (red, outside, AM), microphone (patterned blue, inside, M), pneumatic pressure sensor, green, inside, PS) to initiate the mechanical sensing process of the HPM100 (Source code 3). (B) Fiber – cartridge arrangement in the HPM100 with the fiber at an angle of 60° to the upper half-cylinder: Sample plane: black, fiber: gray, Light rays: red. Mechanical components of HPM100 are not shown. (C) Sample loading scheme (D) Rebuild chamber to enable irradiance calculation. (E) CCD image of the

736

737 photodiode in the sample plane. **(F)** The spatial irradiance distribution with a peak irradiance of  
738  $\sim 6 \text{ mW/mm}^2$  at 80% intensity of the LED was calculated using a self-written MATLAB routine  
739 *intensityprofilcalculator.m* (Source code 4). Depicted are pixel values in irradiance.

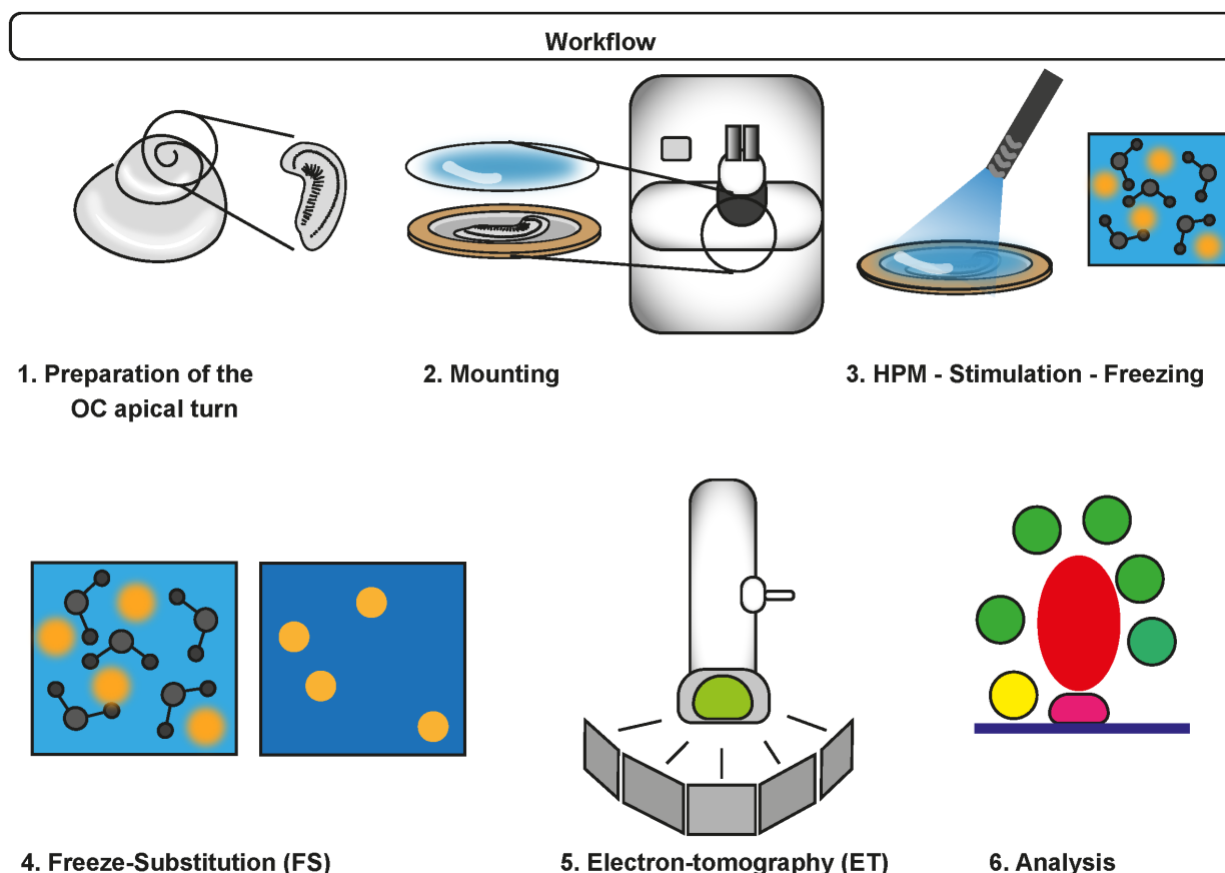

740

#### 741 **Figure 4-figure supplement 1 Workflow of Opto-HPF**

742 After dissection of the organ of Corti (OC), the sample is mounted and inserted in the HPM. The  
743 blue light stimulation occurs in the HPM freezing chamber with subsequent freezing. Finally,  
744 freeze-substitution is performed followed by ET and data analysis.

745

746 Our three incorporated external sensors, (i) an *accelerometer*, (ii) a *microphone*, and (iii)  
747 a *pneumatic pressure sensor* (Fig. 4, Fig. 5) allowed us to calculate for each shot the  
748 absolute time scale from the *HPM start* till the specimen is reaching  $0^\circ\text{C}$  ( $T_{HPM \text{ delay from}}$   
749 *START*, Fig. 5).

750 The pneumatic pressure sensor was located directly at the pneumatically steered needle  
751 valve in front of the freezing chamber (Fig. 5A-C). In contrast to the other sensors, the  
752 pneumatic pressure sensor provided a reliably signal of the moment when the needle  
753 valve opened to allow influx of pressurized  $\text{LN}_2$  into the freezing chamber (Fig. 5C; green  
754 curve; the green arrowhead points out the time point when the needle valve opens). We

755 used this point to align the curves obtained from the internal sensors, which show the  
756 internal pressure buildup (Fig. 5C, gray curve) and the gradual temperature decline (Fig.  
757 5C, purple curve) inside the freezing chamber after the opening of the needle valve. We  
758 set the onset (StimStart) of a 100 ms light stimulation between *HPM start* ( $t = 0$ ) and  $T$   
759 *HPM delay from START* (calculated for each shot; Fig. 5D).

760 To obtain short stimulations (ShortStim), StimStart was set at 425 ms. Based on the  
761 correlation of the pneumatic pressure sensor curve with the internal pressure and  
762 temperature curves, the samples were stimulated during ~17 to ~25 ms before the  
763 freezing onset (Fig. 5D, lower panel). To obtain longer stimulations (LongStim), StimStart  
764 was set at 390 ms, which resulted in light stimulation durations from ~48 to ~76 ms before  
765 the freezing onset (Fig. 5D, upper panel).



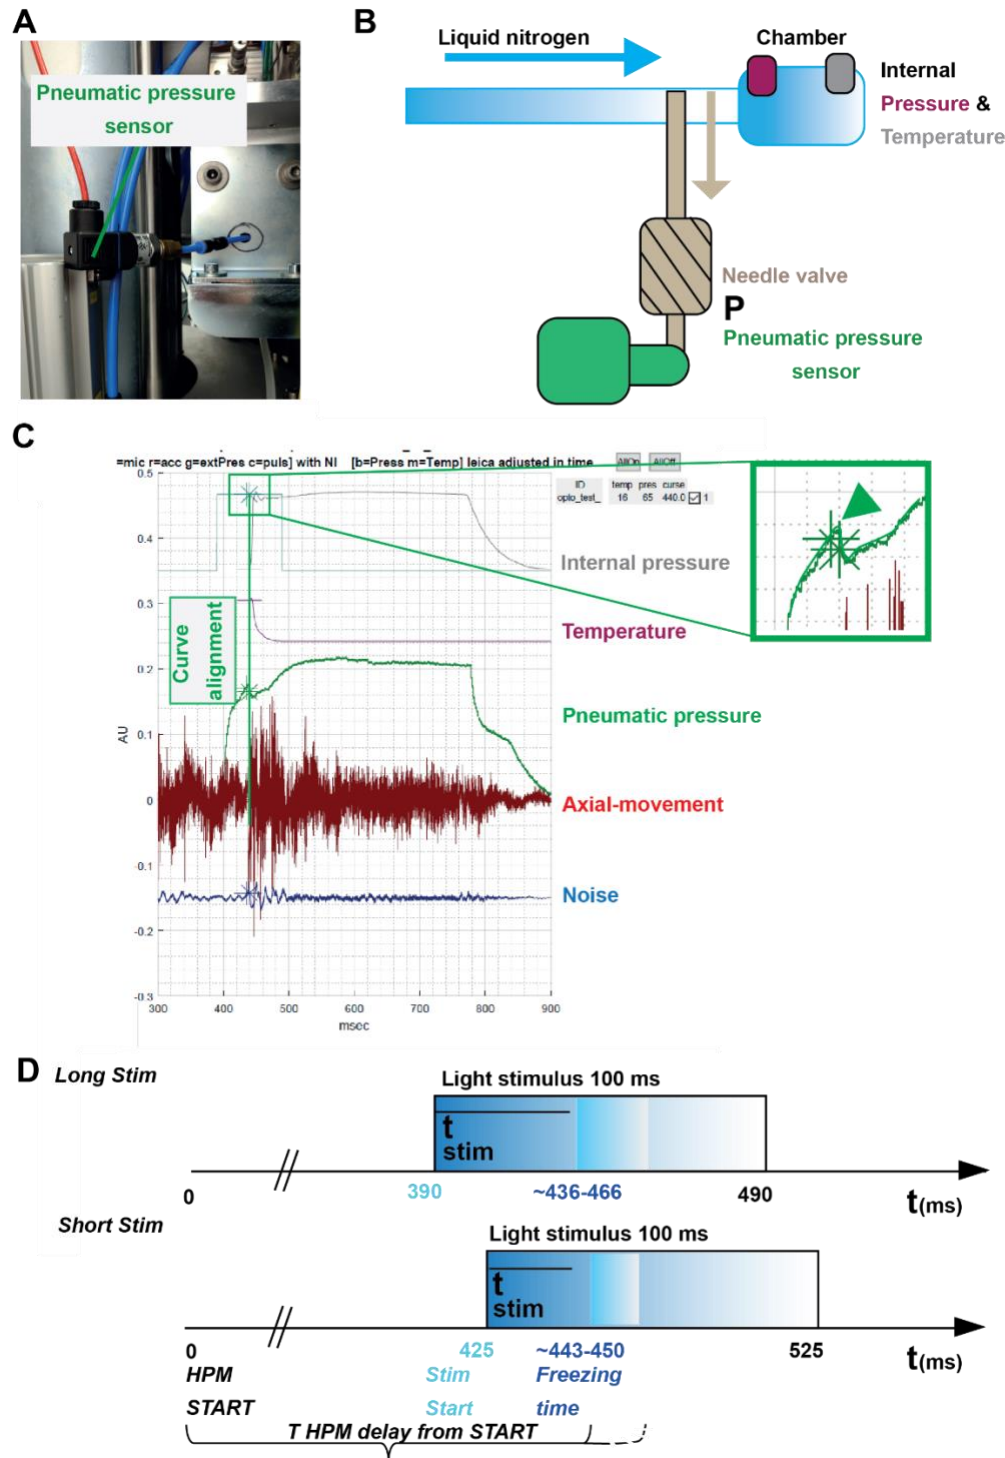

766

767 **Figure 5 Correlating the sensor signals to internal pressure and temperature measured**  
 768 **inside the HPM**

769 **(A)** Pneumatic pressure sensor inside the HPM100. **(B)** Scheme of the localization of the  
 770 pneumatic pressure sensor below the pneumatic needle valve, which allows LN<sub>2</sub> influx in the  
 771 chamber for freezing. **(C)** Depicted are the curves from the different sensors aligned by using the

772 MATLAB GUI (Source code 5). The curves of the pressure-build up start and temperature  
773 corresponding decline are aligned to the steep drop in the pneumatic pressure curve (green  
774 arrowhead, inset). **(D)** The outline of the optical stimulation incorporated with HPF: 100 ms light  
775 pulse set to a 390 ms delay from HPM start resulted in a stimulation duration of 48-76 ms before  
776 freezing ("LongStim") and that set to a 425 ms delay from HPM start in a stimulation of 17-25 ms  
777 ("ShortStim").

778

## 779 [First ultrastructural analysis of optogenetic stimulated IHC ribbon synapses,](#) 780 [coupling structure to function](#)

781 We analyzed the ultrastructural changes upon precise optical stimulation of ChR2-  
782 expressing IHCs (*Ai32VC cre<sup>+</sup>* and *Ai32KI cre<sup>+</sup>*). Our two stimulation paradigms  
783 (ShortStim and LongStim, Fig. 6C and D) aimed to capture two functional states of  
784 exocytosis at IHCs. A ShortStim (~17-25 ms) might reflect the changes after/during RRP  
785 release, while a LongStim (~48-76 ms) might reflect sustained exocytosis (Moser and  
786 Beutner, 2000; Rutherford and Roberts, 2006). We included two controls (i) B6J under  
787 light stimulation (B6J Light; Fig. 6A) and (ii) ChR2-expressing IHCs (*Ai32VC cre<sup>+</sup>* and  
788 *Ai32KI cre<sup>+</sup>*) without any light stimulation (ChR2 NoLight; Fig. 6B). For the light control on  
789 B6J, we chose a LongStim protocol assuming that potential direct light effects are  
790 strongest with the longer exposure. Table 3 includes the number of ribbons and animals  
791 included from each genotype in the analysis.

792 We started our ultrastructural analysis with the determination of the total count of MP-SVs  
793 and RA-SVs (Fig. 6-figure supplement 1A). We found no alterations in the size of the MP-  
794 SV and RA-SV pools among the various conditions and controls (Fig. 6E), except for a  
795 larger MP-SV pool in ChR2 NoLight compared to B6J Light. This might reflect different  
796 proportions of ribbon-type AZs contained in the tomograms obtained from 250 nm  
797 sections that do not always include the full AZs.

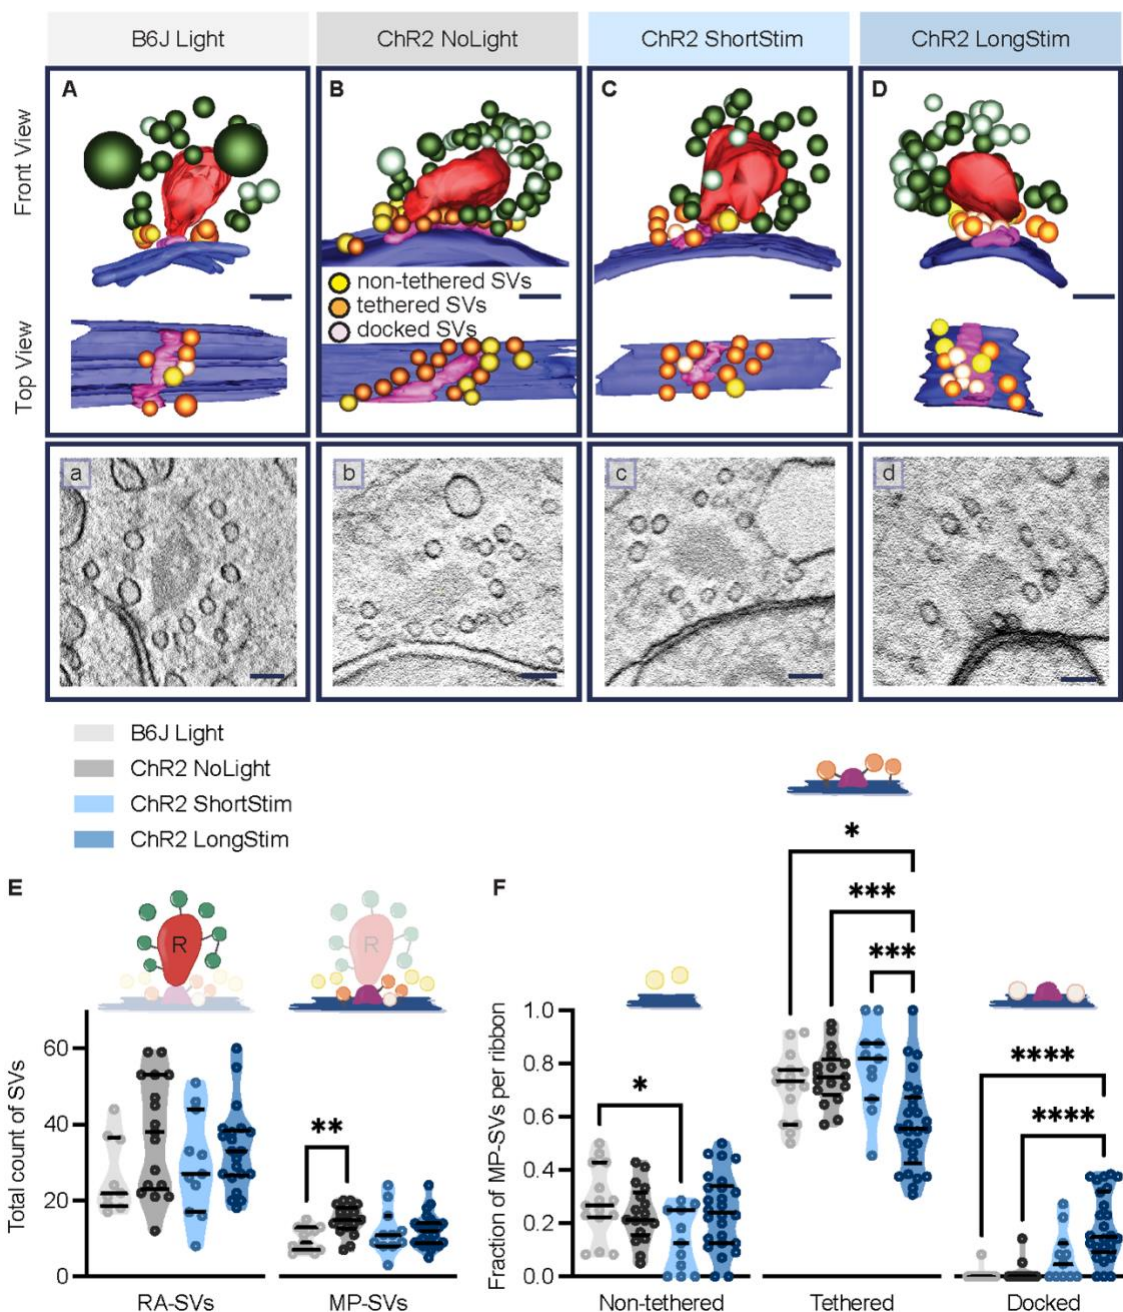

798

799 **Figure 6 Functional AZ states differ in their morphologically defined vesicle pools**  
 800 Representative tomographic 3D reconstructions of (A) B6J Light, (B) ChR2 NoLight, (C) ChR2  
 801 ShortStim and (D) ChR2 LongStim displayed in both front view (upper part of the panel) and  
 802 top view (lower part of the panel). (a-d) Corresponding virtual sections of A-D. The AZ membrane is  
 803 shown in blue, presynaptic density in pink, ribbons in red, MP-SVs (non-tethered in yellow,  
 804 tethered in orange and docked in light pink), RA-SVs (green, light green). Magnification 12,000x;  
 805 scale bars, 100 nm. (E) Total count of SVs per pool (RA- and MP-SV pools), per ribbon. (F) The  
 806 fraction of non-tethered, tethered and docked MP-SVs per ribbon. Data are presented in mean  $\pm$   
 807 SEM. \* $p < 0.05$ , \*\* $p < 0.01$ , \*\*\* $p < 0.001$  and \*\*\*\* $p < 0.0001$ . Statistical test: one-way ANOVA

808 followed by Tukey's test (parametric data) and KW test followed by Dunn's test (non-parametric  
809 data). MP-SV pool: B6J Light:  $n = 15$  ribbons,  $N_{animals} = 2$ ; ChR2 NoLight:  $n = 17$  ribbons  $N_{animals} =$   
810  $4$ ; ChR2 ShortStim:  $n = 11$  ribbons,  $N_{animals} = 1$ ; ChR2 LongStim:  $n = 26$  ribbons,  $N_{animals} = 4$ .  
811 RA-SV pool: B6J Light:  $n = 9$  ribbons,  $N_{animals} = 1$ ; ChR2 NoLight:  $n = 17$  ribbons  $N_{animals} = 4$ ; ChR2  
812 ShortStim:  $n = 11$  ribbons,  $N_{animals} = 1$ ; ChR2 LongStim:  $n = 21$  ribbons,  $N_{animals} = 3$ .  
813

### 814 Enhanced SV docking in correlation to stimulus duration

815 Next, we performed in-depth analysis of MP-SV sub-pools among the various conditions  
816 (Fig. 6F). As the full inclusion of the ribbon is relatively rare in 250-nm sections (Fig. 6A-  
817 D), we compared the fractions of non-tethered, tethered and docked MP-SVs as done  
818 previously (Chakrabarti et al., 2018). The fraction of non-tethered SVs decreased after a  
819 short light pulse (B6J Light =  $0.28 \pm 0.03$ , ChR2 NoLight =  $0.23 \pm 0.03$ , ChR2 ShortStim  
820 =  $0.13 \pm 0.03$ ), while the fraction of tethered SVs decreased upon a long stimulation (B6J  
821 Light =  $0.71 \pm 0.03$ , ChR2 NoLight =  $0.75 \pm 0.02$ , ChR2 ShortStim =  $0.79 \pm 0.05$ , ChR2  
822 LongStim =  $0.57 \pm 0.03$ ). Values and information about statistics can be found in Table 3  
823 and a separate quantification of the used ChR2 mice can be found in Fig. 6-figure  
824 supplement 1.

825 The fraction of morphologically docked SVs increased upon optogenetic stimulation (Fig.  
826 6F), being more prominent upon a long stimulation (B6J Light =  $0.005 \pm 0.005$ , ChR2  
827 NoLight =  $0.01 \pm 0.008$ , ChR2 ShortStim =  $0.076 \pm 0.03$ , ChR2 LongStim =  $0.18 \pm 0.02$ ).  
828 We conclude that optogenetic stimulation changes the sub-pools of MP-SVs, with a  
829 prominent increase of docked SVs proportional to the stimulation duration and fewer  
830 tethered and non-tethered SVs.

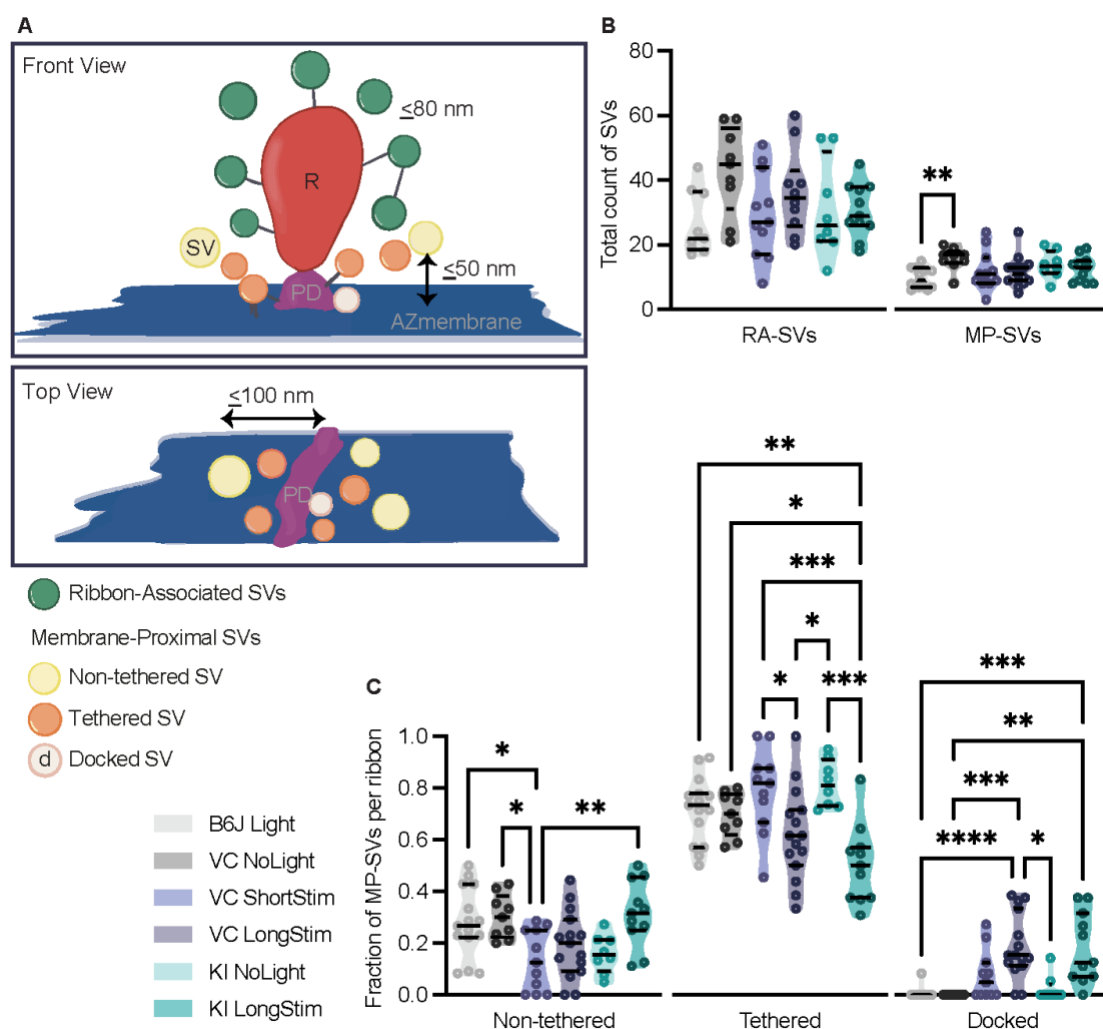

831

832 **Figure 6-figure supplement 1 Analysis of morphologically defined vesicle pools for each**  
 833 **genotype**

834 **(A)** Schematic illustration of a ribbon synapse (not drawn to scale) showing the parameters taken  
 835 into account for the analysis of the different vesicle pools. Membrane-proximal (MP)-SVs  
 836 constitute the first-row of vesicles within 50 nm membrane-to-membrane distance from the AZ-  
 837 membrane (blue) and 100 nm from the presynaptic density (PD, pink). Non-tethered SVs are in  
 838 yellow, tethered in orange and docked in light pink. For Ribbon-associated (RA)-SVs, vesicles  
 839 (green) within 80 nm from the ribbon (R, in red) are included. **(B)** Total count of SVs per pool (RA-  
 840 and MP-SV pools), per ribbon. **(C)** Fraction of non-tethered, tethered and docked MP-SVs per  
 841 ribbon for the controls as well as for Ai32VC\_ShortStim, Ai32VC\_LongStim and Ai32KI\_LongStim  
 842 Data are presented in mean  $\pm$  SEM. \* $p < 0.05$ , \*\* $p < 0.01$ , \*\*\* $p < 0.001$  and \*\*\*\* $p < 0.0001$ .  
 843 Statistical test: one-way ANOVA followed by Tukey's test (parametric data) and KW test followed  
 844 by Dunn's test (non-parametric data).

845 MP-SV pool: B6J\_LongStim:  $n = 15$  ribbons,  $N_{animals} = 2$ ; Ai32VC\_NoLight:  $n = 9$  ribbons  $N_{animals}$   
 846  $= 2$ ; Ai32VC\_ShortStim:  $n = 11$  ribbons,  $N_{animals} = 1$ . Ai32VC\_LongStim:  $n = 15$  ribbons,  $N_{animals} =$   
 847  $2$ . Ai32KI\_LongStim:  $n = 11$  ribbons  $N_{animals} = 2$ ; Ai32KI\_NoLight:  $n = 8$  ribbons  $N_{animals} = 2$ .

848 RA-SV pool: B6J\_LongStim:  $n = 9$  ribbons,  $N_{animals} = 1$ ; Ai32VC\_NoLight:  $n = 9$  ribbons  $N_{animals} =$   
849 2; Ai32VC\_ShortStim:  $n = 11$  ribbons,  $N_{animals} = 1$ ; Ai32VC\_LongStim:  $n = 10$  ribbons,  $N_{animals} = 1$ ;  
850 Ai32KI\_LongStim:  $n = 11$  ribbons  $N_{animals} = 2$ ; Ai32KI\_NoLight:  $n = 8$  ribbons  $N_{animals} = 2$ .

851

## 852 SV distances to the PD and AZ membrane decrease upon long stimulation

853 It was previously proposed that SVs are recruited to the AZ membrane via tethers, a  
854 process that takes place rather close to the presynaptic density (PD) (Chakrabarti et al.,  
855 2018; Frank et al., 2010; Vogl et al., 2015). Therefore, we evaluated the distances of all  
856 MP-SVs to the AZ membrane and to the PD. We found that the distances of MP-SVs to  
857 the AZ membrane decreased upon stimulation (Fig. 7A), indicating recruitment of SVs to  
858 the AZ membrane. Moreover, SVs were found closer to the PD upon light stimulation (Fig.  
859 7B), likely bringing them close to the voltage-gated  $Ca^{2+}$  channels that are situated  
860 underneath to the PD (Neef et al., 2018; Pangrsic et al., 2018; Wong et al., 2014). This  
861 trend was only significant for ChR2 LongStim (all values can be found in Table 3). We  
862 conclude that upon stimulation, SVs are recruited more tightly to the AZ membrane and  
863 potentially closer to the  $Ca^{2+}$  channels. Similar results were obtained for the individual  
864 genotypes (Fig. 7-figure supplement 1).

865

866

867

868

869

870

871

872

873

874

875

876

877

878

|                                | B6J Light        | ChR2 NoLight     | ChR2 ShortStim   | ChR2 LongStim    | Adjusted p-value                                                                                                                | Test                     |
|--------------------------------|------------------|------------------|------------------|------------------|---------------------------------------------------------------------------------------------------------------------------------|--------------------------|
| $N_{\text{animals}}$           | 2                | 4                | 1                | 4                |                                                                                                                                 |                          |
| $n_{\text{ribbons Total}}$     | 15               | 17               | 11               | 26               |                                                                                                                                 |                          |
| $n_{\text{ribbons Ai32VC}}$    |                  | 9                | 11               | 15               |                                                                                                                                 |                          |
| $n_{\text{ribbons Ai32KI}}$    |                  | 8                | 0                | 11               |                                                                                                                                 |                          |
| MP-SVs count                   | 9.73<br>± 0.796  | 14.88<br>± 0.935 | 12.00<br>± 1.844 | 11.96<br>± 0.833 | B6J Light vs. ChR2 NoLight<br>0.0028                                                                                            | KW Test -<br>Dunn's test |
| Fraction of non-tethered SVs   | 0.28<br>± 0.035  | 0.23<br>± 0.026  | 0.14<br>± 0.035  | 0.25<br>± 0.028  | B6J Light vs. ChR2 ShortStim<br>0.0313                                                                                          | ANOVA -<br>Tukey's test  |
| Fraction of tethered SVs       | 0.72<br>± 0.033  | 0.75<br>± 0.025  | 0.79<br>± 0.049  | 0.57<br>± 0.034  | B6J Light vs. ChR2 LongStim<br>0.0173<br>ChR2 LongStim vs. ChR2 NoLight<br>0.0009<br>ChR2 LongStim vs. ChR2 ShortStim<br>0.0006 | ANOVA -<br>Tukey's test  |
| Fraction of docked SVs         | 0.01<br>± 0.006  | 0.01<br>± 0.009  | 0.08<br>± 0.029  | 0.18<br>± 0.025  | B6J Light vs. ChR2 LongStim<br><0.0001<br>ChR2 LongStim vs. ChR2 NoLight<br><0.0001                                             | KW Test -<br>Dunn's test |
| Distance of SV to the membrane | 22.78<br>± 1.08  | 23.67<br>± 0.776 | 19.41<br>± 1.263 | 19.61<br>± 0.876 | ChR2 LongStim vs. ChR2 NoLight<br>0.0007<br>ChR2 NoLight vs. ChR2 ShortStim<br>0.0105                                           | KW Test -<br>Dunn's test |
| Distance of SV to the PD       | 31.88<br>± 2.144 | 37.61<br>± 1.622 | 32.96<br>± 2.192 | 30.13<br>± 1.509 | ChR2 LongStim vs. ChR2 NoLight<br>0.0001                                                                                        | KW Test -<br>Dunn's test |
| Diameter of SVs                | 49.00<br>± 0.442 | 48.67<br>± 0.25  | 49.17<br>± 0.352 | 48.05<br>± 0.303 |                                                                                                                                 | KW Test -<br>Dunn's test |
| $N_{\text{animals}}$           | 1                | 4                | 1                | 3                |                                                                                                                                 |                          |
| $n_{\text{ribbons Total}}$     | 9                | 17               | 11               | 21               |                                                                                                                                 |                          |
| $n_{\text{ribbons Ai32VC}}$    |                  | 9                | 11               | 10               |                                                                                                                                 |                          |
| $n_{\text{ribbons Ai32KI}}$    |                  | 8                | 0                | 11               |                                                                                                                                 |                          |
| RA-SVs count                   | 26.44<br>± 3.296 | 37.35<br>± 3.683 | 29.45<br>± 4.059 | 33.33<br>± 2.372 | n.s                                                                                                                             | ANOVA -<br>Tukey's test  |

879 **Table 3 List of SV parameters showing the mean ± SEM values, N, n, p-values and the**  
880 **statistical tests applied**

881 Data are presented as mean ± SEM. Data was tested for significant differences by one-way  
882 ANOVA followed by Tukey's test (parametric data) or KW test followed by Dunn's test (non-  
883 parametric data). Significant results are indicated with \* p< 0.05; \*\* p<0.05; and \*\*\*\* p< 0.0001.

## 884 SV diameters remain largely unchanged in the MP-SV pool

885 In order to approach possible release mechanisms for IHC ribbon synapses, we  
886 determined the SV diameter for all MP-SVs. Previous studies using 15 min K<sup>+</sup> stimulation  
887 already excluded a large increase of SV sizes upon prolonged stimulation close to the AZ  
888 membrane (Chakrabarti et al., 2018; Chapochnikov et al., 2014). However, early  
889 exocytosis phases could not be monitored at IHC ribbon synapses up to now. If homotypic  
890 or compound fusion takes place, one would expect an increase in diameter of SV close  
891 to the AZ membrane (He et al., 2009; Lenzi et al., 2002). We found no differences in the  
892 diameters of the MP-SVs between the stimulated and non-stimulated conditions (Fig. 7C;  
893 values and details for statistics in Table 3) We investigated the SV diameter distribution  
894 in more detail by sorting all MP-SVs into different bins. We examined small SVs > 40 nm  
895 in diameter as well as large SVs ≤ 60 nm, and the frequency distribution between 45 and  
896 60 in 5 nm steps. There were no obvious shifts in the frequency distributions of the SV  
897 diameters (Fig. 7Cii). In conclusion, homotypic SV fusion events do not seem to take  
898 place among MP-SVs of the IHC synapse under our stimulation paradigms.

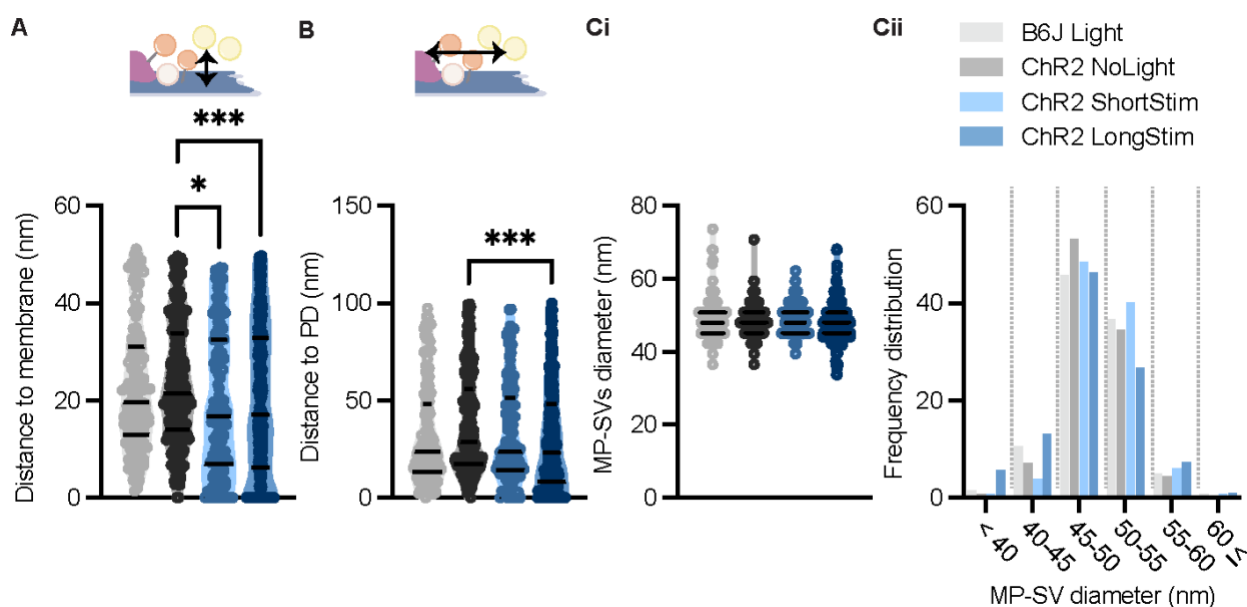

899 **Figure 7 MP-SVs come closer to the AZ membrane and the presynaptic density upon light**  
900 **stimulation.**

901 **(A)** MP-SVs distance to the AZ membrane. **(B)** MP-SVs distance to the PD. **(Ci)** Diameter of MP-  
902 SVs quantified from the outer rim to the outer rim. **(Cii)** Frequency distribution of SV diameter of  
903 all MP-SVs. Data are presented in mean ± SEM. \*p < 0.05, \*\*p < 0.01, \*\*\*p < 0.001 and \*\*\*\*p <  
904 0.0001. Statistical test: one-way ANOVA followed by Tukey's test (parametric data) and KW test  
905 followed by Dunn's test (non-parametric data).  
906



907 B6J Light:  $n = 15$  ribbons,  $N_{animals} = 2$ ; ChR2 NoLight:  $n = 17$  ribbons  $N_{animals} = 4$ ; ChR2 ShortStim:  
 908  $n = 11$  ribbons,  $N_{animals} = 1$ ; ChR2 LongStim:  $n = 26$  ribbons,  $N_{animals} = 4$ .

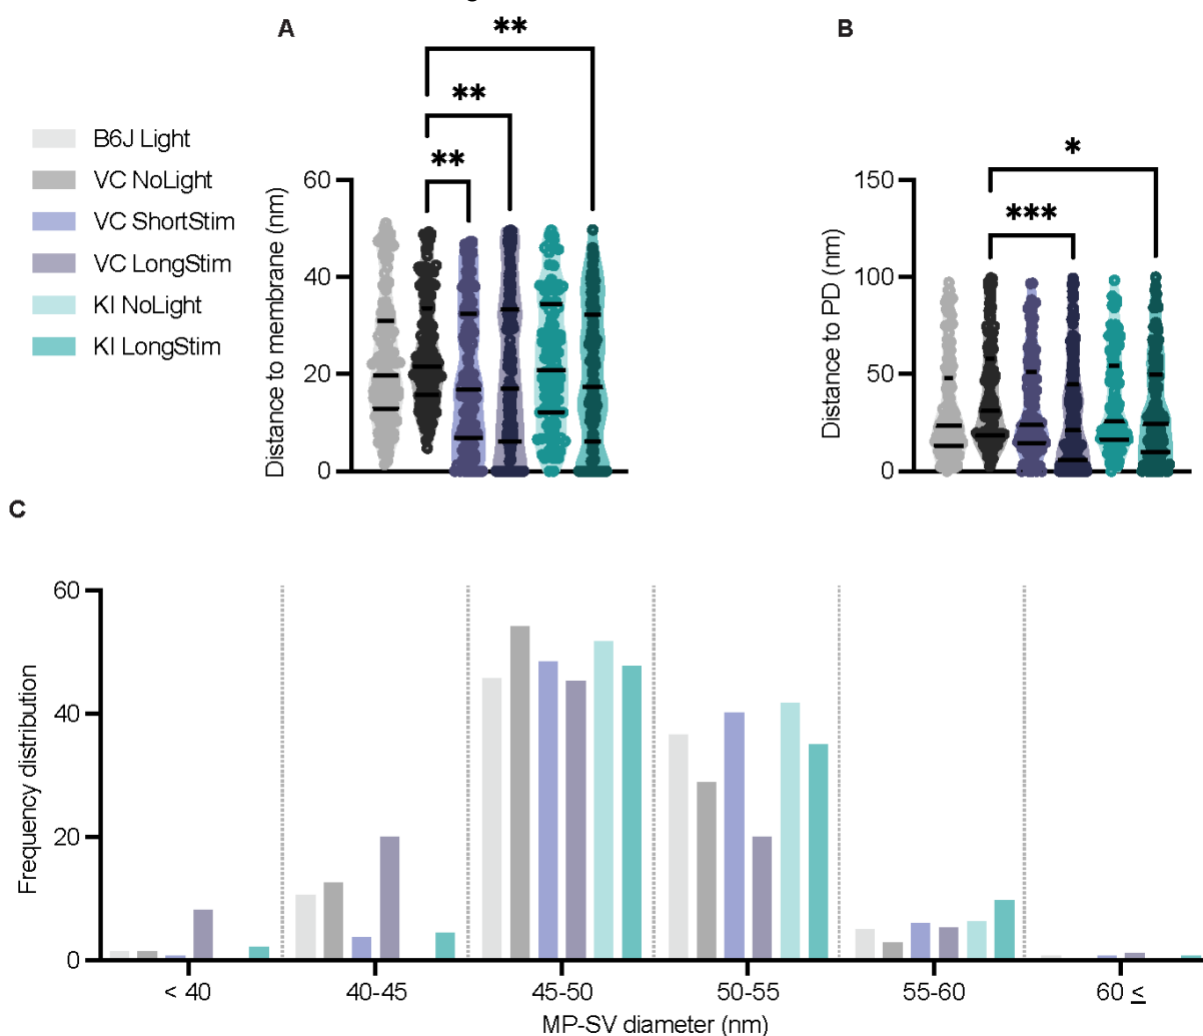

909  
 910 **Figure 7-figure supplement 1 Distances of MP-SVs to the AZ membrane and the**  
 911 **presynaptic density as well as their diameters**  
 912 **(A)** MP-SVs distance to the AZ membrane. **(D)** MP-SVs distance to the PD. **(E)** Frequency  
 913 distribution of SV diameter of all MP-SVs. Data are presented in mean  $\pm$  SEM. \* $p < 0.05$ , \*\* $p <$   
 914  $0.01$ , \*\*\* $p < 0.001$  and \*\*\*\* $p < 0.0001$ . Statistical test: one-way ANOVA followed by Tukey's test  
 915 (parametric data) and KW test followed by Dunn's test (non-parametric data).

916 B6J\_LongStim:  $n = 15$  ribbons,  $N_{animals} = 2$ ; Ai32VC\_NoLight:  $n = 9$  ribbons  $N_{animals} = 2$ ;  
 917 Ai32VC\_ShortStim:  $n = 11$  ribbons,  $N_{animals} = 1$ ; Ai32VC\_LongStim:  $n = 15$  ribbons,  $N_{animals} = 2$ ;  
 918 Ai32KI\_NoLight:  $n = 8$  ribbons,  $N_{animals} = 2$ ; Ai32KI\_LongStim:  $n = 11$  ribbons,  $N_{animals} = 2$   
 919

## 920 Discussion

921 In the current study, we established Opto-HPF with a millisecond range physiological  
 922 stimulation, followed by FS and ET for structure-function analysis of IHC ribbon synapses.

923 This enabled near-to-native state preservation of the ultrastructure of exocytic steps  
924 occurring within milliseconds and offered a closer correlation to cell-physiological  
925 stimulation paradigms widely used in the field. Patch-clamp recordings validated the  
926 photoresponses of ChR2-expressing IHCs and demonstrated optogenetically triggered  
927 glutamate release. Further, we provide a strategy for precise synchronization of HPF with  
928 optogenetic stimulation. In summary (Fig. 8), our analysis revealed a stimulation-  
929 dependent accumulation of docked SVs at IHC AZs. Moreover, we found a slight  
930 reduction of the distance of non-docked SVs to the AZ membrane and the PD, even more  
931 prominent with longer stimulation duration. Finally, with this physiological stimulation, we  
932 did not observe large SVs or other morphological correlates of potential homotypic fusion  
933 events in the MP-SV pool.

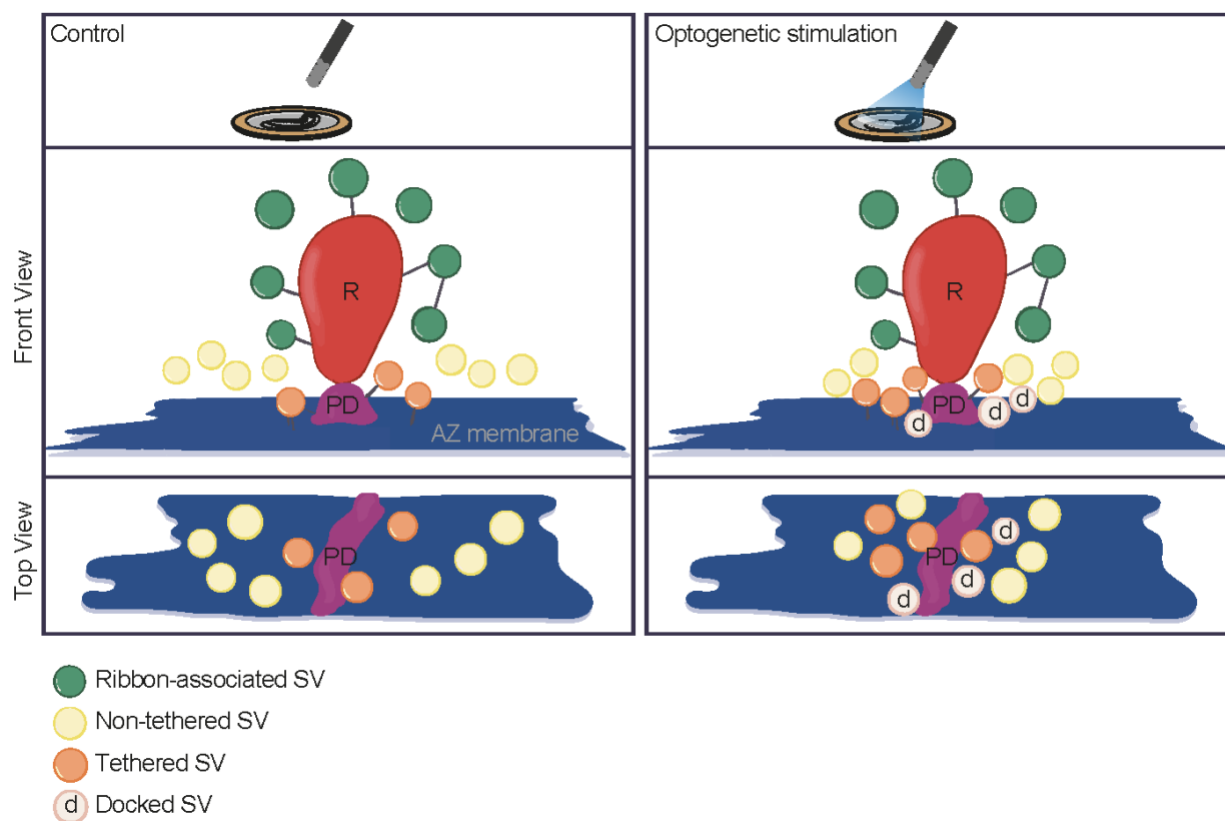

934

### 935 **Figure 8 Summary**

936 Optogenetic stimulation of IHCs mobilize SVs more tightly to the AZ membrane and potentially  
937 closer to the  $\text{Ca}^{2+}$  channels. The proportion of docked and tethered SVs increased upon  
938 stimulation duration, while the total count of MP-SVs and RA-SVs stayed stable. The distance of  
939 MP-SVs to the AZ membrane decreased with stimulation duration.

940

## 941 Validation of Opto-HPF in IHCs

942 Using immunofluorescence microscopy, immunogold electron microscopy and patch-  
943 clamp recordings, we observed an efficient and functional expression of ChR2 (H134R)  
944 in IHCs of mouse lines that employed Vglut3-dependent Cre expression. Blue light pulses  
945 evoked photocurrents and -depolarizations similar to previous reports in other cell types  
946 (Boyden et al., 2005; Cardin et al., 2010; Hernandez et al., 2014; Kittelmann et al., 2013;  
947 Nikolic et al., 2009). Our patch-clamp recordings of ChR2-expressing IHCs or of the  
948 postsynaptic bouton revealed that a 10 ms light pulse of 6-16 mW/mm<sup>2</sup> was sufficient to  
949 i) depolarize the IHC by 50 mV within 10 to 20 ms and ii) trigger EPSCs at individual  
950 synapses with latencies of 15-20 ms. Longer stimulations of similar irradiance decreased  
951 the time to peak of photodepolarization and EPSC latencies and resulted in a sustained  
952 release. Part of this sustained release is attributed to the slow repolarization of the IHCs  
953 (>40 ms) due to the presence of K<sup>+</sup> channel blockers (TEA-CL and Cs<sup>+</sup> in the present  
954 study). Based on the charge of the light-evoked EPSCs, the recorded EPSCs most likely  
955 reflect the fusion of several SVs at the individual AZ. Under the premise that an individual  
956 SV leads to a charge transfer ranging from 50 to 600 fC (Huang and Moser, 2018;  
957 Rutherford et al., 2012), our optogenetic stimulation of IHCs triggers the release of more  
958 than 10 SVs on the recorded AZs. This number of released SVs and the presence of an  
959 immediate plateau indicates depletion of the RRP even after short and mild light  
960 stimulations.

961 In order to arrive at a reliable Opto-HPF operation when using the HPM100, we added  
962 further functionalities to the machine. The pneumatic pressure sensor, which was placed  
963 in close proximity to the freezing chamber, accurately enabled us to calculate the time  
964 point when pressurized LN<sub>2</sub> entered the freezing chamber. This allowed a correlation to  
965 the data of internal pressure and temperature sensors, whereas the other sensors  
966 provided less reliable signals. To achieve short and long light stimulations in the HPM,  
967 we chose a single light pulse with different onset time points. According to the sensor  
968 curves, we obtained light stimulations between 17 and 76 ms. Our ShortStim (~20 ms)  
969 and LongStim (~50 ms) Opto-HPF paradigms aimed to capture ultrastructural correlates  
970 of such phasic and sustained exocytosis and matched stimulus durations widely used in  
971 electrophysiology of hair cell exocytosis (e.g. Cho et al., 2011; Goutman and Glowatzki,

972 2007; Johnson et al., 2017; Michalski et al., 2017; Moser and Beutner, 2000; Parsons et  
973 al., 1994; Schnee et al., 2005). IHC patch-clamp indicates that RRP is released within the  
974 first 20 ms of step depolarization (Goutman and Glowatzki, 2007; Moser and Beutner,  
975 2000) while longer depolarizations recruit additional SVs for sustained exocytosis  
976 (Goutman and Glowatzki, 2007; Moser and Beutner, 2000). Furthermore, instead of  
977 applying trains of short light pulses as typically used for neuronal cell types (Berndt et al.,  
978 2011; Boyden et al., 2005; Imig et al., 2020; Ishizuka et al., 2006; Kleinlogel et al., 2011;  
979 Lin et al., 2009), we opted for a continuous light pulse to mimic a step-like receptor  
980 potential of IHCs in the high frequency cochlea of the mouse (Russell and Sellick, 1978).  
981 The ultrastructural findings upon light stimulation in the HPM undoubtedly reflect  
982 snapshots of exocytosis at the IHC synapse.

### 983 [Resolving IHCs synaptic vesicle pools with Opto-HPF](#)

984 Significant efforts have been made to address the mechanisms of SV release at different  
985 ribbon synapses by studying morphologically defined SV populations using ET. These  
986 studies proposed that the SVs situated close to the AZ membrane represent the “ultrafast  
987 release pool” (Lenzi and von Gersdorff, 2001; Lenzi et al., 1999), and SVs further away  
988 around the ribbon are accessible for slower release (Lenzi et al., 1999).  
989 Capacitance measurements (Beutner and Moser, 2001; Johnson et al., 2005; Khimich et  
990 al., 2005; Moser and Beutner, 2000; Pangrsic et al., 2010), fluorescence imaging  
991 (Griesinger et al., 2005; Özçete and Moser, 2020) and recordings from single spiral  
992 ganglion neurons (Buran et al., 2010; Frank et al., 2010; Goutman and Glowatzki, 2007;  
993 Jean et al., 2018; Jung et al., 2015a; Peterson et al., 2014) propose an RRP with a size  
994 of between 4 to 45 vesicles per AZ which partially depletes with a time constant of 3 to  
995 54 ms. The broad range of size and release kinetics estimates results from differences in  
996 methods, stimulus paradigms and experimental conditions as well as in assumptions of  
997 model-based data analysis. Moreover, heterogeneity of AZs may also play a role. These  
998 physiological estimates of RRP size enclose the number of approximately 10 MP-SVs.  
999 Yet, docking of SVs, often considered to be the ultrastructural correlate of fusion  
1000 competence, is virtually absent from IHC AZs in non-stimulated conditions (present study  
1001 and (Chakrabarti et al., 2018)). Moreover, in contrast to the physiological evidence for a  
1002 partial RRP depletion, IHC ribbon synapses did not display a significant reduction in MP-

1003 SVs upon optogenetic stimulation on the ultrastructural level. Strikingly, instead and  
1004 contrary to conventional and retinal ribbon synapses (Borges-Merjane et al., 2020; Imig  
1005 et al., 2020; Watanabe et al., 2013b), there is a prominent increase in docked SVs  
1006 (present study and (Chakrabarti et al., 2018)).

1007 Finding an accumulation of docked SVs upon strong depolarization seems puzzling given  
1008 estimated rates of SV replenishment and subsequent fusion of 180-2000 SV/s at IHC  
1009 ribbon synapses (Buran et al., 2010; Goutman and Glowatzki, 2007; Jean et al., 2018;  
1010 Pangrsic et al., 2010; Peterson et al., 2014; Schnee et al., 2011; Strenzke et al., 2016).  
1011 Indeed, such high speed and indefatigable SV release enable firing up to approximately  
1012 100 spikes/s in the quiet and steady state firing of up a few hundred spikes/s upon strong  
1013 sound stimulation (Buran et al., 2010; Evans, 1972; Huet et al., 2016; Jean et al., 2018;  
1014 Kiang et al., 1965; Liberman and Kiang, 1978; Schmiedt, 1989; Taberner and Liberman,  
1015 2005). Do these docked SVs represent release ready SVs that are more likely detected  
1016 upon massive turnover? Do they reflect “kiss and stay” release events or limited clearance  
1017 of vesicles following release? Does the lack of docked SVs at resting IHC synapses reflect  
1018 a rapid undocking process?

1019 SV clearance of the AZ (Neher and Sakaba, 2008) has been suggested as a potentially  
1020 rate-limiting mechanism of sustained exocytosis in IHCs of mice with mutations in the  
1021 genes coding for otoferlin (Chakrabarti et al., 2018; Pangrsic et al., 2010; Strenzke et al.,  
1022 2016) or endocytic proteins (Jung et al., 2015b; Kroll et al., 2019; Kroll et al., 2020). While  
1023 our EPSC recordings suggest the ongoing release of neurotransmitter beyond 20 and 50  
1024 ms after light onset, limited clearance of the release sites cannot be excluded. The  
1025 concept implies full collapse fusion followed by clearance of SV proteolipid from the  
1026 release site for it to engage a new coming SV. Indeed, full collapse fusion followed by  
1027 clathrin- and dynamin-dependent endocytosis has been indicated for IHCs (Grabner and  
1028 Moser, 2018; Neef et al., 2014; Tertrais et al., 2019). Yet, unlike for retinal ribbon  
1029 synapses (Zampighi et al., 2006; Zampighi et al., 2011) we did not observe omega-  
1030 profiles or hemifusion states of SVs at IHCs AZ opposing the postsynaptic density.

1031 While we have favored the hypothesis that, eventually, fusion pore initiated release  
1032 typically proceeds to full collapse fusion (Chapochnikov et al., 2014), there is support for  
1033 “kiss and run” exocytosis (Alabi and Tsien, 2013) to occur at IHCs from reports of ultrafast

1034 endocytosis (time constant ~300 ms) (Beutner et al., 2001; Neef et al., 2014; Tertrais et  
1035 al., 2019) and cell-attached capacitance measurements (Grabner and Moser, 2018).  
1036 Could the accumulation of docked SVs during stimulation then represent “kiss and run”  
1037 or “kiss and stay” (Shin et al., 2018) release events? Unfortunately, cell-attached  
1038 membrane capacitance recordings from IHCs did not resolve fusion pores (Grabner and  
1039 Moser, 2018), probably owing to the small SV capacitance (40 aF). Future work including  
1040 super-resolution imaging (Shin et al., 2018) and/or Opto-HPF on IHCs with genetic or  
1041 pharmacological interference might shed light on the existence of a prevalence of “kiss  
1042 and run” or “kiss and stay” at IHC synapses. Freezing times between 5 to 15 ms after the  
1043 light onset seem necessary to further address this hypothesis.

1044 Finally, a recent study using electrical stimulation and HPF in hippocampal neurons  
1045 reported full replenishment of docked SVs within 14 ms, but this docking state was only  
1046 transient, and SVs could potentially undock during the next 100 ms (Kusick et al., 2020).  
1047 Indeed, physiological evidence for reversible priming and docking has been reported for  
1048 various neurosecretory preparations (e.g. Dinkelacker et al., 2000; He et al., 2017; Nagy  
1049 et al., 2004; Smith et al., 1998). The balance of  $Ca^{2+}$  and otoferlin-dependent  
1050 replenishment of docked and primed SVs with SV fusion and/or undocking/depriming  
1051 would then set the “standing RRP” (Pangrsic et al., 2010) and the abundance of docked  
1052 SVs. Besides increased docking, the decreased distance between SVs and the plasma  
1053 membrane and presynaptic density upon light stimulation supports the previously  
1054 proposed sequence of events at IHC ribbon synapses (Chakrabarti et al., 2018). The  
1055 sequence for SV release involves tethering and subsequent docking, similarly to originally  
1056 described in conventional synapses using cryo-ET (Fernández-Busnadiego et al., 2013).  
1057 Aside from RIMs, which support SV tethering to the AZ membrane at conventional  
1058 (Fernández-Busnadiego et al., 2013) and IHC ribbon synapses (Jung et al., 2015a),  
1059 otoferlin (Pangrsic et al., 2010; Vogl et al., 2015) rather than neuronal SNAREs (Nouvian  
1060 et al., 2011; but see Safieddine and Wenthold, 1999) and members of the Munc-13/CAPS  
1061 families of priming factors (Vogl et al., 2015) seem to contribute to preparing SVs for  
1062 fusion. It will be interesting for future studies to further decipher the underlying molecular  
1063 machinery at the hair cell synapses and to test whether and to what extent tethering and  
1064 docking are reversible processes.

1065

## 1066 Conclusion

1067 Significant efforts have been made to address the release scenarios at ribbon synapses  
1068 by EM (Chakrabarti et al., 2018; Chapochnikov et al., 2014; Lenzi et al., 2002; Matthews  
1069 and Sterling, 2008; von Gersdorff et al., 1996; Zampighi et al., 2011). This study offers an  
1070 experimental approach for structure-function correlation at IHC ribbon synapses. We  
1071 conclude that activation of ChR-2 rapidly depolarizes IHCs and triggers release within few  
1072 milliseconds in response to brief light flashes. This constitutes a non-invasive approach  
1073 that overcomes the low temporal resolution of the conventional high K<sup>+</sup> depolarization  
1074 used for electron microscopy of IHC synapses thus far. Combining optogenetic  
1075 stimulation with high-pressure freezing appears as a promising technique to achieve the  
1076 temporal and spatial resolution required to study the short-term cellular processes  
1077 occurring during exocytosis and endocytosis. Notably, we did not observe events that  
1078 resemble homotypic SV fusion or cumulative fusion close to the AZ membrane of the  
1079 synaptic ribbon. Further, the RA- as well as the MP-SV pools stayed stable or were rapidly  
1080 replenished, rather a decrease of the fraction of non-tethered SVs within the MP-SV pool  
1081 was observed. Finally, the absence of docked SV in non-stimulated IHCs might speak for  
1082 unquantal release, possibly also due to fast undocking, to prevail for spontaneous  
1083 release events.

1084

## 1085 Acknowledgements

1086 We thank A.J. Goldak, S. Langer, S. Gerke, and C. Senger-Freitag for expert technical  
1087 assistance. We would like to thank P. Wenig for the technical support in establishing the  
1088 HPM setup. We would like to thank T. Mager for helpful discussion on the irradiance and  
1089 the company Leica for support with the sensors.

## 1090 Funding

1091 This work was funded by grants of the German Research Foundation through the  
1092 collaborative research center 889 (projects A02 to TM, A07 to CW), the collaborative  
1093 research center 1286 (A04 to CW, B05 to TM and Z04 to FO), the Leibniz program (to  
1094 TM), Niedersächsisches Vorab (TM) and EXC 2067/1- 390729940 (MBExC to TM) and

1095 Erwin Neher Fellowship to LMJT. LMJT received an Erasmus Mundus scholarship—  
1096 Neurasmus during part of this work.

### 1097 [Author contributions](#)

1098 RC established and performed Opto-HPF and analysis of the ultrastructural data, electron  
1099 tomography (ET), pre-embedding immunogold labeling and contributed to the  
1100 immunohistochemistry. LMJT performed all cell physiology and according analysis and  
1101 contributed to the immunohistochemistry and prepared figures. LS performed Opto-HPF,  
1102 analysis of the ultrastructural data, ET and prepared figures. MRC performed  
1103 immunofluorescence, analysis of ribbon numbers, helped in pre-embedding immunogold  
1104 analysis and Opto-setup and prepared figures. GH programmed the MATLAB GUI,  
1105 MATLAB interface, installed the sensors to the Opto-HPF. MS performed part of the  
1106 ultrastructural analysis and ET, and EF performed part of the ET analysis. KB established  
1107 and performed the irradiance measurement. ÖDÖ designed primers for genotyping. TP  
1108 contributed to the KI line. SM supported HPF and statistical analysis of the SV diameters.  
1109 JN supervised LMJT cell physiology, contributed to immunostainings. MG performed the  
1110 statistical analysis for the SV diameters. FO developed nanogold coupled nanobodies  
1111 and helped to design the labeling protocol. TM designed the study and supervised LMJT/  
1112 cell physiology. CW designed the study and supervised Opto-HPF and immunostainings  
1113 and prepared figures. CW, TM and LMJT wrote the manuscript with the help of all authors.

1114

### 1115 [Conflict of interest](#)

1116 FO is a shareholder of Nanotag Biotechnologies GmbH. The remaining authors declare not  
1117 competing interests.

1118

### 1119 [Additional Files](#)

1120 Source Code 1: IMARIS custom plug-ins for the analysis of Figure 1D

1121 Source code 2: Igor Pro custom-written analysis (*OptoEPSCs*) of light-evoked EPSCs related  
1122 to Figure 3C-F.

1123 Source code 3: MATLAB scripts (*HPMacquire*) for the computer interface to control the light  
1124 pulse for Opto-HPF. Related to Figure 4A



1125 Source code 4: MATLAB script (*Intensityprofilecalculator*) for the analysis of the irradiance in  
1126 Figure 4E.

1127 Source code 5: MATLAB scripts (*HPManalyse*) for the alignment of the data obtained from the  
1128 Opto-HPF sensors. Related to Figure 5C.

1129

## 1130 [References](#)

1131 **Alabi, A. A. and Tsien, R. W.** (2013). Perspectives on kiss-and-run: role in exocytosis,  
1132 endocytosis, and neurotransmission. *Annu. Rev. Physiol.* **75**, 393–422.

1133 **Berndt, A., Schoenenberger, P., Mattis, J., Tye, K. M., Deisseroth, K., Hegemann, P.**  
1134 **and Oertner, T. G.** (2011). High-efficiency channelrhodopsins for fast neuronal  
1135 stimulation at low light levels. *Proc. Natl. Acad. Sci.* **108**, 7595–7600.

1136 **Beutner, D. and Moser, T.** (2001). The Presynaptic Function of Mouse Cochlear Inner  
1137 Hair Cells during Development of Hearing. *J. Neurosci.* **21**, 4593–4599.

1138 **Beutner, D., Voets, T., Neher, E. and Moser, T.** (2001). Calcium Dependence of  
1139 Exocytosis and Endocytosis at the Cochlear Inner Hair Cell Afferent Synapse.  
1140 *Neuron* **29**, 681–690.

1141 **Borges-Merjane, C., Kim, O. and Jonas, P.** (2020). Functional Electron Microscopy,  
1142 “Flash and Freeze,” of Identified Cortical Synapses in Acute Brain Slices. *Neuron*  
1143 **105**, 992-1006.e6.

1144 **Boyden, E. S., Zhang, F., Bamberg, E., Nagel, G. and Deisseroth, K.** (2005).  
1145 Millisecond-timescale, genetically targeted optical control of neural activity. *Nat*  
1146 *Neurosci* **8**, 1263–1268.

1147 **Buran, B. N., Strenzke, N., Neef, A., Gundelfinger, E. D., Moser, T. and Liberman, M.**  
1148 **C.** (2010). Onset coding is degraded in auditory nerve fibers from mutant mice  
1149 lacking synaptic ribbons. *J. Neurosci. Off. J. Soc. Neurosci.* **30**, 7587–7597.

1150 **Cardin, J. A., Carlén, M., Meletis, K., Knoblich, U., Zhang, F., Deisseroth, K., Tsai,**  
1151 **L.-H. and Moore, C. I.** (2010). Targeted optogenetic stimulation and recording of  
1152 neurons in vivo using cell-type-specific expression of Channelrhodopsin-2. *Nat.*  
1153 *Protoc.* **5**, 247–254.

1154 **Chakrabarti, R., Michanski, S. and Wichmann, C.** (2018). Vesicle sub-pool  
1155 organization at inner hair cell ribbon synapses. *EMBO Rep.* e44937.

1156 **Chapochnikov, N. M., Takago, H., Huang, C.-H., Pangršič, T., Khimich, D., Neef, J.,**  
1157 **Auge, E., Göttfert, F., Hell, S. W., Wichmann, C., et al.** (2014). Uniquantal  
1158 Release through a Dynamic Fusion Pore Is a Candidate Mechanism of Hair Cell  
1159 Exocytosis. *Neuron* **17**, 1389–1403.

1160 **Cho, S., Li, G.-L. and von Gersdorff, H.** (2011). Recovery from Short-Term Depression  
1161 and Facilitation Is Ultrafast and Ca<sup>2+</sup> Dependent at Auditory Hair Cell Synapses.  
1162 *J. Neurosci.* **31**, 5682–5692.

1163 **Cole, A. A., Chen, X. and Reese, T. S.** (2016). A Network of Three Types of Filaments  
1164 Organizes Synaptic Vesicles for Storage, Mobilization, and Docking. *J. Neurosci.*  
1165 **36**, 3222–3230.

- 1166 **Dinkelacker, V., Voets, T., Neher, E. and Moser, T.** (2000). The readily releasable pool  
1167 of vesicles in chromaffin cells is replenished in a temperature-dependent manner  
1168 and transiently overfills at 37 C. *J. Neurosci.* **20**, 8377.
- 1169 **Evans, E. F.** (1972). The frequency response and other properties of single fibres in the  
1170 guinea-pig cochlear nerve. *J. Physiol.* **226**, 263–287.
- 1171 **Fernández-Busnadiego, R., Zuber, B., Maurer, U. E., Cyrklaff, M., Baumeister, W.**  
1172 **and Lučić, V.** (2010). Quantitative analysis of the native presynaptic cytomatrix by  
1173 cryoelectron tomography. *J. Cell Biol.* **188**, 145–156.
- 1174 **Fernández-Busnadiego, R., Asano, S., Oprisoreanu, A.-M., Sakata, E., Doengi, M.,**  
1175 **Kochovski, Z., Zürner, M., Stein, V., Schoch, S., Baumeister, W., et al.** (2013).  
1176 Cryo-electron tomography reveals a critical role of RIM1 $\alpha$  in synaptic vesicle  
1177 tethering. *J. Cell Biol.* **201**, 725–740.
- 1178 **Frank, T., Rutherford, M. A., Strenzke, N., Neef, A., Pangršič, T., Khimich, D.,**  
1179 **Fejtova, A., Gundelfinger, E. D., Liberman, M. C., Harke, B., et al.** (2010).  
1180 Bassoon and the synaptic ribbon organize Ca<sup>2+</sup> channels and vesicles to add  
1181 release sites and promote refilling. *Neuron* **68**, 724–738.
- 1182 **Glowatzki, E. and Fuchs, P. A.** (2002). Transmitter release at the hair cell ribbon  
1183 synapse. *Nat. Neurosci.* **5**, 147–154.
- 1184 **Goutman, J. D. and Glowatzki, E.** (2007). Time course and calcium dependence of  
1185 transmitter release at a single ribbon synapse. *Proc. Natl. Acad. Sci.* **104**, 16341–  
1186 16346.
- 1187 **Grabner, C. P. and Moser, T.** (2018). Individual synaptic vesicles mediate stimulated  
1188 exocytosis from cochlear inner hair cells. *Proc. Natl. Acad. Sci.* **115**, 12811–12816.
- 1189 **Griesinger, C. B., Richards, C. D. and Ashmore, J. F.** (2005). Fast vesicle  
1190 replenishment allows indefatigable signalling at the first auditory synapse. *Nature*  
1191 **435**, 212–215.
- 1192 **He, L., Xue, L., Xu, J., McNeil, B. D., Bai, L., Melicoff, E., Adachi, R. and Wu, L.-G.**  
1193 (2009). Compound vesicle fusion increases quantal size and potentiates synaptic  
1194 transmission. *Nature* **459**, 93–97.
- 1195 **He, E., Wierda, K., van Westen, R., Broeke, J. H., Toonen, R. F., Cornelisse, L. N.**  
1196 **and Verhage, M.** (2017). Munc13-1 and Munc18-1 together prevent NSF-  
1197 dependent de-priming of synaptic vesicles. *Nat. Commun.* **8**, 15915.
- 1198 **Helmprobst, F., Frank, M. and Stigloher, C.** (2015). Presynaptic architecture of the  
1199 larval zebrafish neuromuscular junction. *J. Comp. Neurol.* **523**, 1984–1997.
- 1200 **Hernandez, V. H., Gehrt, A., Reuter, K., Jing, Z., Jeschke, M., Mendoza Schulz, A.,**  
1201 **Hoch, G., Bartels, M., Vogt, G., Garnham, C. W., et al.** (2014). Optogenetic  
1202 stimulation of the auditory pathway. *J. Clin. Invest.* **124**, 1114–1129.
- 1203 **Hintze, A., Gültas, M., Semmelhack, E. A. and Wichmann, C.** (2021). Ultrastructural  
1204 maturation of the endbulb of Held active zones comparing wild-type and otoferlin-  
1205 deficient mice. *iScience* **24**, 102282.
- 1206 **Huang, C.-H. and Moser, T.** (2018). Ca<sup>2+</sup> Regulates the Kinetics of Synaptic Vesicle  
1207 Fusion at the Afferent Inner Hair Cell Synapse. *Front. Cell. Neurosci.* **12**, 364.
- 1208 **Huet, A., Batrel, C., Tang, Y., Desmadryl, G., Wang, J., Puel, J.-L. and Bourien, J.**  
1209 (2016). Sound coding in the auditory nerve of gerbils. *Hear. Res.*

- 1210 **Imig, C., Min, S.-W., Krinner, S., Arancillo, M., Rosenmund, C., Südhof, T. C., Rhee,**  
1211 **J., Brose, N. and Cooper, B. H.** (2014). The morphological and molecular nature  
1212 of synaptic vesicle priming at presynaptic active zones. *Neuron* **84**, 416–431.
- 1213 **Imig, C., López-Murcia, F. J., Maus, L., García-Plaza, I. H., Mortensen, L. S., Schwark,**  
1214 **M., Schwarze, V., Angibaud, J., Nägerl, U. V., Taschenberger, H., et al.** (2020).  
1215 Ultrastructural Imaging of Activity-Dependent Synaptic Membrane-Trafficking  
1216 Events in Cultured Brain Slices. *Neuron* **108**, 843-860.e8.
- 1217 **Ishizuka, T., Kakuda, M., Araki, R. and Yawo, H.** (2006). Kinetic evaluation of  
1218 photosensitivity in genetically engineered neurons expressing green algae light-  
1219 gated channels. *Neurosci. Res.* **54**, 85–94.
- 1220 **Jaime Tobón, L. M.** (2015). Role of Endophilin in Exocytosis and Endocytosis in Inner  
1221 Hair Cell (IHC) Ribbon Synapses.
- 1222 **Jean, P., Morena, D. L. de la, Michanski, S., Tobón, L. M. J., Chakrabarti, R., Picher,**  
1223 **M. M., Neef, J., Jung, S., Gültas, M., Maxeiner, S., et al.** (2018). The synaptic  
1224 ribbon is critical for sound encoding at high rates and with temporal precision. *eLife*  
1225 **7**, e29275.
- 1226 **Johnson, S. L., Marcotti, W. and Kros, C. J.** (2005). Increase in efficiency and reduction  
1227 in Ca<sup>2+</sup> dependence of exocytosis during development of mouse inner hair cells.  
1228 *J. Physiol.* **563**, 177–191.
- 1229 **Johnson, S. L., Olt, J., Cho, S., von Gersdorff, H. and Marcotti, W.** (2017). The  
1230 Coupling between Ca<sup>2+</sup> Channels and the Exocytotic Ca<sup>2+</sup> Sensor at Hair Cell  
1231 Ribbon Synapses Varies Tonotopically along the Mature Cochlea. *J. Neurosci.* **37**,  
1232 2471–2484.
- 1233 **Jung, S., Oshima-Takago, T., Chakrabarti, R., Wong, A. B., Jing, Z., Yamanbaeva,**  
1234 **G., Picher, M. M., Wojcik, S. M., Göttfert, F., Predoehl, F., et al.** (2015a). Rab3-  
1235 interacting molecules 2 $\alpha$  and 2 $\beta$  promote the abundance of voltage-gated Ca<sub>v</sub>1.3  
1236 Ca<sup>2+</sup> channels at hair cell active zones. *Proc. Natl. Acad. Sci.* **112**, E3141–E3149.
- 1237 **Jung, S., Maritzen, T., Wichmann, C., Jing, Z., Neef, A., Revelo, N. H., Al-Moyed, H.,**  
1238 **Meese, S., Wojcik, S. M., Panou, I., et al.** (2015b). Disruption of adaptor protein  
1239 2 $\mu$  (AP-2 $\mu$ ) in cochlear hair cells impairs vesicle reloading of synaptic release sites  
1240 and hearing. *EMBO J.* **34**, 2686–2702.
- 1241 **Khimich, D., Nouvian, R., Pujol, R., tom Dieck, S., Egner, A., Gundelfinger, E. D. and**  
1242 **Moser, T.** (2005). Hair cell synaptic ribbons are essential for synchronous auditory  
1243 signalling. *Nature* **434**, 889–894.
- 1244 **Kiang, N. Y. S., Watanabe, T., Thomas, E.C. and Clark, L.F.** (1965). *Discharge Patterns*  
1245 *of Single Fibers in the Cat's Auditory Nerve*. Cambridge, Massachusetts: MIT  
1246 Press.
- 1247 **Kittelman, M., Liewald, J. F., Hegemann, J., Schultheis, C., Brauner, M., Steuer**  
1248 **Costa, W., Wabnig, S., Eimer, S. and Gottschalk, A.** (2013). In vivo synaptic  
1249 recovery following optogenetic hyperstimulation. *Proc. Natl. Acad. Sci. U. S. A.*  
1250 **110**, E3007-3016.
- 1251 **Kleinlogel, S., Feldbauer, K., Dempf, R. E., Fotis, H., Wood, P. G., Bamann, C. and**  
1252 **Bamberg, E.** (2011). Ultra light-sensitive and fast neuronal activation with the  
1253 Ca<sup>2+</sup>-permeable channelrhodopsin CatCh. *Nat. Neurosci.* **14**, 513–518.
- 1254 **Kremer, J. R., Mastrorade, D. N. and McIntosh, J. R.** (1996). Computer visualization  
1255 of three-dimensional image data using IMOD. *J. Struct. Biol.* **116**, 71–76.

- 1256 **Kroll, J., Jaime Tobón, L. M., Vogl, C., Neef, J., Kondratiuk, I., König, M., Strenzke,**  
1257 **N., Wichmann, C., Milosevic, I. and Moser, T.** (2019). Endophilin-A regulates  
1258 presynaptic Ca<sup>2+</sup> influx and synaptic vesicle recycling in auditory hair cells. *EMBO*  
1259 *J.* **38**,.
- 1260 **Kroll, J., Özçete, Ö. D., Jung, S., Maritzen, T., Milosevic, I., Wichmann, C. and Moser,**  
1261 **T.** (2020). AP180 promotes release site clearance and clathrin-dependent vesicle  
1262 reformation in mouse cochlear inner hair cells. *J. Cell Sci.* **133**,.
- 1263 **Kusick, G. F., Chin, M., Raychaudhuri, S., Lippmann, K., Adula, K. P., Hujber, E. J.,**  
1264 **Vu, T., Davis, M. W., Jorgensen, E. M. and Watanabe, S.** (2020). Synaptic  
1265 vesicles transiently dock to refill release sites. *Nat. Neurosci.* **23**, 1329–1338.
- 1266 **Lenzi, D., Crum, J., Ellisman, M. H. and Roberts, W. M.** (2002). Depolarization  
1267 redistributes synaptic membrane and creates a gradient of vesicles on the synaptic  
1268 body at a ribbon synapse. *Neuron* **36**, 649–659.
- 1269 **Liberman, M. C. and Kiang, N. Y.** (1978). Acoustic trauma in cats. Cochlear pathology  
1270 and auditory-nerve activity. *Acta Oto-Laryngol. Suppl.* **358**, 1–63.
- 1271 **Lin, J. Y., Lin, M. Z., Steinbach, P. and Tsien, R. Y.** (2009). Characterization of  
1272 engineered channelrhodopsin variants with improved properties and kinetics.  
1273 *Biophys. J.* **96**, 1803–1814.
- 1274 **Lou, S., Duan, B., Vong, L., Lowell, B. B. and Ma, Q.** (2013). Runx1 Controls Terminal  
1275 Morphology and Mechanosensitivity of VGLUT3-expressing C-Mechanoreceptors.  
1276 *J. Neurosci.* **33**, 870–882.
- 1277 **Madisen, L., Mao, T., Koch, H., Zhuo, J., Berenyi, A., Fujisawa, S., Hsu, Y.-W. A., Iii,**  
1278 **A. J. G., Gu, X., Zanella, S., et al.** (2012). A toolbox of Cre-dependent optogenetic  
1279 transgenic mice for light-induced activation and silencing. *Nat. Neurosci.* **15**, 793–  
1280 802.
- 1281 **Mastrorade, D. N.** (2005). Automated electron microscope tomography using robust  
1282 prediction of specimen movements. *J. Struct. Biol.* **152**, 36–51.
- 1283 **Matthews, G. and Sterling, P.** (2008). Evidence that vesicles undergo compound fusion  
1284 on the synaptic ribbon. *J. Neurosci.* **28**, 5403.
- 1285 **Maus, L., Lee, C., Altas, B., Sertel, S. M., Weyand, K., Rizzoli, S. O., Rhee, J., Brose,**  
1286 **N., Imig, C. and Cooper, B. H.** (2020). Ultrastructural Correlates of Presynaptic  
1287 Functional Heterogeneity in Hippocampal Synapses. *Cell Rep.* **30**, 3632–3643.e8.
- 1288 **Michalski, N. A., Goutman, J. D., Auclair, S. M., Monvel, J. B. de, Tertrais, M.,**  
1289 **Emptoz, A., Parrin, A., Nouaille, S., Guillon, M., Sachse, M., et al.** (2017).  
1290 Otoferlin acts as a Ca<sup>2+</sup> sensor for vesicle fusion and vesicle pool replenishment  
1291 at auditory hair cell ribbon synapses. *eLife* **6**, e31013.
- 1292 **Moser, T. and Beutner, D.** (2000). Kinetics of exocytosis and endocytosis at the cochlear  
1293 inner hair cell afferent synapse of the mouse. *Proc. Natl. Acad. Sci.* **97**, 883–888.
- 1294 **Moser, T., Grabner, C. P. and Schmitz, F.** (2019). Sensory processing at ribbon  
1295 synapses in the retina and the cochlea. *Physiol. Rev.* **100**, 103–144.
- 1296 **Nagel, G., Ollig, D., Fuhrmann, M., Kateriya, S., Musti, A. M., Bamberg, E. and**  
1297 **Hegemann, P.** (2002). Channelrhodopsin-1: a light-gated proton channel in green  
1298 algae. *Science* **296**, 2395–2398.
- 1299 **Nagel, G., Szellas, T., Huhn, W., Kateriya, S., Adeishvili, N., Berthold, P., Ollig, D.,**  
1300 **Hegemann, P. and Bamberg, E.** (2003). Channelrhodopsin-2, a directly light-

- 1301 gated cation-selective membrane channel. *Proc. Natl. Acad. Sci.* **100**, 13940–  
1302 13945.
- 1303 **Nagy, G., Reim, K., Matti, U., Brose, N., Binz, T., Rettig, J., Neher, E. and Sorensen,**  
1304 **J. B.** (2004). Regulation of releasable vesicle pool sizes by protein kinase A-  
1305 dependent phosphorylation of SNAP-25. *Neuron* **41**, 417–429.
- 1306 **Neef, J., Jung, S., Wong, A. B., Reuter, K., Pangrsic, T., Chakrabarti, R., Kugler, S.,**  
1307 **Lenz, C., Nouvian, R., Boumil, R. M., et al.** (2014). Modes and Regulation of  
1308 Endocytic Membrane Retrieval in Mouse Auditory Hair Cells. *J. Neurosci.* **34**, 705–  
1309 716.
- 1310 **Neef, J., Urban, N. T., Ohn, T.-L., Frank, T., Jean, P., Hell, S. W., Willig, K. I. and**  
1311 **Moser, T.** (2018). Quantitative optical nanophysiology of Ca<sup>2+</sup> signaling at inner  
1312 hair cell active zones. *Nat. Commun.* **9**, 290.
- 1313 **Neher, E. and Sakaba, T.** (2008). Multiple roles of calcium ions in the regulation of  
1314 neurotransmitter release. *Neuron* **59**, 861–872.
- 1315 **Nikolic, K., Grossman, N., Grubb, M. S., Burrone, J., Toumazou, C. and Degenaar,**  
1316 **P.** (2009). Photocycles of Channelrhodopsin-2. *Photochem. Photobiol.* **85**, 400–  
1317 411.
- 1318 **Nouvian, R., Neef, J., Bulankina, A. V., Reisinger, E., Pangršič, T., Frank, T., Sikorra,**  
1319 **S., Brose, N., Binz, T. and Moser, T.** (2011). Exocytosis at the hair cell ribbon  
1320 synapse apparently operates without neuronal SNARE proteins. *Nat. Neurosci.* **14**,  
1321 411–413.
- 1322 **Özçete, Ö. D. and Moser, T.** (2020). A sensory cell diversifies its output by varying Ca<sup>2+</sup>  
1323 influx-release coupling among active zones. *EMBO J.*
- 1324 **Pangrsic, T., Lasarow, L., Reuter, K., Takago, H., Schwander, M., Riedel, D., Frank,**  
1325 **T., Tarantino, L. M., Bailey, J. S., Strenzke, N., et al.** (2010). Hearing requires  
1326 otoferlin-dependent efficient replenishment of synaptic vesicles in hair cells. *Nat.*  
1327 *Neurosci.* **13**, 869–876.
- 1328 **Pangrsic, T., Singer, J. H. and Koschak, A.** (2018). Voltage-Gated Calcium Channels:  
1329 Key Players in Sensory Coding in the Retina and the Inner Ear. *Physiol. Rev.* **98**,  
1330 2063–2096.
- 1331 **Parsons, T. D., Lenzi, D., Almers, W. and Roberts, W. M.** (1994). Calcium-triggered  
1332 exocytosis and endocytosis in an isolated presynaptic cell: capacitance  
1333 measurements in saccular hair cells. *Neuron* **13**, 875–883.
- 1334 **Parthasarathy, A. and Kujawa, S. G.** (2018). Synaptopathy in the Aging Cochlea:  
1335 Characterizing Early-Neural Deficits in Auditory Temporal Envelope Processing. *J.*  
1336 *Neurosci. Off. J. Soc. Neurosci.* **38**, 7108–7119.
- 1337 **Peterson, A. J., Irvine, D. R. F. and Heil, P.** (2014). A model of synaptic vesicle-pool  
1338 depletion and replenishment can account for the interspike interval distributions  
1339 and nonrenewal properties of spontaneous spike trains of auditory-nerve fibers. *J.*  
1340 *Neurosci. Off. J. Soc. Neurosci.* **34**, 15097–15109.
- 1341 **Russell, I. J. and Sellick, P. M.** (1978). Intracellular studies of hair cells in the mammalian  
1342 cochlea. *J. Physiol.* **284**, 261–290.
- 1343 **Rutherford, M. A. and Roberts, W. M.** (2006). Frequency selectivity of synaptic  
1344 exocytosis in frog saccular hair cells. *Proc. Natl. Acad. Sci. U. S. A.* **103**, 2898.

- 1345 **Rutherford, M. A., Chapochnikov, N. M. and Moser, T.** (2012). Spike Encoding of  
1346 Neurotransmitter Release Timing by Spiral Ganglion Neurons of the Cochlea. *J.*  
1347 *Neurosci.* **32**, 4773–4789.
- 1348 **Rutherford, M. A., von Gersdorff, H. and Goutman, J. D.** (2021). Encoding sound in  
1349 the cochlea: from receptor potential to afferent discharge. *J. Physiol.* **599**, 2527–  
1350 2557.
- 1351 **Safieddine, S. and Wenthold, R. J.** (1999). SNARE complex at the ribbon synapses of  
1352 cochlear hair cells: analysis of synaptic vesicle- and synaptic membrane-  
1353 associated proteins. *Eur. J. Neurosci.* **11**, 803–812.
- 1354 **Safieddine, S., El-Amraoui, A. and Petit, C.** (2012). The auditory hair cell ribbon  
1355 synapse: from assembly to function. *Annu. Rev. Neurosci.* **35**, 509–528.
- 1356 **Schikorski, T. and Stevens, C. F.** (1997). Quantitative ultrastructural analysis of  
1357 hippocampal excitatory synapses. *J. Neurosci. Off. J. Soc. Neurosci.* **17**, 5858–  
1358 5867.
- 1359 **Schindelin, J., Arganda-Carreras, I., Frise, E., Kaynig, V., Longair, M., Pietzsch, T.,  
1360 Preibisch, S., Rueden, C., Saalfeld, S., Schmid, B., et al.** (2012). Fiji: an open-  
1361 source platform for biological-image analysis. *Nat. Methods* **9**, 676–682.
- 1362 **Schmiedt, R. A.** (1989). Spontaneous rates, thresholds and tuning of auditory-nerve  
1363 fibers in the gerbil: comparisons to cat data. *Hear. Res.* **42**, 23–35.
- 1364 **Schnee, M. E., Lawton, D. M., Furness, D. N., Benke, T. A. and Ricci, A. J.** (2005).  
1365 Auditory hair cell-afferent fiber synapses are specialized to operate at their best  
1366 frequencies. *Neuron* **47**, 243–254.
- 1367 **Schnee, M. E., Santos-Sacchi, J., Castellano-Muñoz, M., Kong, J.-H. and Ricci, A. J.**  
1368 (2011). Calcium-Dependent Synaptic Vesicle Trafficking Underlies Indefatigable  
1369 Release at the Hair Cell Afferent Fiber Synapse. *Neuron* **70**, 326–338.
- 1370 **Sergeyenko, Y., Lall, K., Liberman, M. C. and Kujawa, S. G.** (2013). Age-related  
1371 cochlear synaptopathy: an early-onset contributor to auditory functional decline. *J.*  
1372 *Neurosci.* **33**, 13686–13694.
- 1373 **Shin, W., Ge, L., Arpino, G., Villarreal, S. A., Hamid, E., Liu, H., Zhao, W.-D., Wen, P.  
1374 J., Chiang, H.-C. and Wu, L.-G.** (2018). Visualization of Membrane Pore in Live  
1375 Cells Reveals a Dynamic-Pore Theory Governing Fusion and Endocytosis. *Cell*  
1376 **173**, 934-945.e12.
- 1377 **Siksou, L., Rostaing, P., Lechaire, J.-P., Boudier, T., Ohtsuka, T., Fejtová, A., Kao,  
1378 H.-T., Greengard, P., Gundelfinger, E. D., Triller, A., et al.** (2007). Three-  
1379 dimensional architecture of presynaptic terminal cytomatrix. *J. Neurosci.* **27**, 6868–  
1380 6877.
- 1381 **Smith, C., Moser, T., Xu, T. and Neher, E.** (1998). Cytosolic Ca<sup>2+</sup> acts by two separate  
1382 pathways to modulate the supply of release-competent vesicles in chromaffin cells.  
1383 *Neuron* **20**, 1243–1253.
- 1384 **Stamatakis, S., Francis, H. W., Lehar, M., May, B. J. and Ryugo, D. K.** (2006). Synaptic  
1385 alterations at inner hair cells precede spiral ganglion cell loss in aging C57BL/6J  
1386 mice. *Hear. Res.* **221**, 104–118.
- 1387 **Strenzke, N., Chakrabarti, R., Al-Moyed, H., Müller, A., Hoch, G., Pangrsic, T.,  
1388 Yamanbaeva, G., Lenz, C., Pan, K.-T., Auge, E., et al.** (2016). Hair cell synaptic  
1389 dysfunction, auditory fatigue and thermal sensitivity in otoferlin Ile515Thr mutants.  
1390 *EMBO J.* **35**, e201694564.

- 1391 **Taberner, A. M. and Liberman, M. C.** (2005). Response Properties of Single Auditory  
1392 Nerve Fibers in the Mouse. *J. Neurophysiol.* **93**, 557–569.
- 1393 **Tertrais, M., Bouleau, Y., Emptoz, A., Belleudy, S., Sutton, R. B., Petit, C.,**  
1394 **Safieddine, S. and Dulon, D.** (2019). Viral Transfer of Mini-Otoferlins Partially  
1395 Restores the Fast Component of Exocytosis and Uncovers Ultrafast Endocytosis  
1396 in Auditory Hair Cells of Otoferlin Knock-Out Mice. *J. Neurosci. Off. J. Soc.*  
1397 *Neurosci.* **39**, 3394–3411.
- 1398 **Vogl, C., Cooper, B. H., Neef, J., Wojcik, S. M., Reim, K., Reisinger, E., Brose, N.,**  
1399 **Rhee, J.-S., Moser, T. and Wichmann, C.** (2015). Unconventional molecular  
1400 regulation of synaptic vesicle replenishment in cochlear inner hair cells. *J. Cell Sci.*  
1401 **128**, 638–644.
- 1402 **Vogl, C., Panou, I., Yamanbaeva, G., Wichmann, C., Mangosing, S. J., Vilardi, F.,**  
1403 **Indzhukulian, A. A., Pangršič, T., Santarelli, R., Rodriguez-Ballesteros, M., et**  
1404 **al.** (2016). Tryptophan-rich basic protein (WRB) mediates insertion of the tail-  
1405 anchored protein otoferlin and is required for hair cell exocytosis and hearing.  
1406 *EMBO J.* **35**, 2536–2552.
- 1407 **von Gersdorff, H., Vardi, E., Matthews, G. and Sterling, P.** (1996). Evidence that  
1408 vesicles on the synaptic ribbon of retinal bipolar neurons can be rapidly released.  
1409 *Neuron* **16**, 1221–1227.
- 1410 **Watanabe, S., Liu, Q., Davis, M. W., Hollopeter, G., Thomas, N., Jorgensen, N. B.**  
1411 **and Jorgensen, E. M.** (2013a). Ultrafast endocytosis at *Caenorhabditis elegans*  
1412 neuromuscular junctions. *eLife* **2**, e00723.
- 1413 **Watanabe, S., Rost, B. R., Camacho-Pérez, M., Davis, M. W., Söhl-Kielczynski, B.,**  
1414 **Rosenmund, C. and Jorgensen, E. M.** (2013b). Ultrafast endocytosis at mouse  
1415 hippocampal synapses. *Nature* **504**, 242–247.
- 1416 **Wichmann, C. and Moser, T.** (2015). Relating structure and function of inner hair cell  
1417 ribbon synapses. *Cell Tissue Res.*
- 1418 **Wong, A. B., Rutherford, M. A., Gabrielaitis, M., Pangršič, T., Göttfert, F., Frank, T.,**  
1419 **Michanski, S., Hell, S., Wolf, F., Wichmann, C., et al.** (2014). Developmental  
1420 refinement of hair cell synapses tightens the coupling of Ca<sup>2+</sup> influx to exocytosis.  
1421 *EMBO J.* **33**, 247–264.
- 1422 **Zampighi, G. A., Zampighi, L. M., Fain, N., Lanzavecchia, S., Simon, S. A. and**  
1423 **Wright, E. M.** (2006). Conical Electron Tomography of a Chemical Synapse:  
1424 Vesicles Docked to the Active Zone are Hemi-Fused. *Biophys. J.* **91**, 2910–2918.
- 1425 **Zampighi, G. A., Schietroma, C., Zampighi, L. M., Woodruff, M., Wright, E. M. and**  
1426 **Brecha, N. C.** (2011). Conical Tomography of a Ribbon Synapse: Structural  
1427 Evidence for Vesicle Fusion. *PLOS ONE* **6**, e16944.
- 1428
